# Supplementary material for: Defining the Age of Young Ischemic Stroke Using Data-Driven Approaches
Source: MDPI journal article supplement (doi:10.3390/jcm12072600), 2023-03-30
Supplement: s1 [file jcm-2267660-supplementary.pdf › jcm-2267660-supplementary.pdf]

# SUPPLEMENTAL MATERIAL FOR

## Define the Age of Young Ischemic Stroke Using Data-Driven Approaches

### Contents

|                                                                                                                                                                                                                         |    |
|-------------------------------------------------------------------------------------------------------------------------------------------------------------------------------------------------------------------------|----|
| <b>Table S1.</b> TRIPOD checklist. ....                                                                                                                                                                                 | 2  |
| <b>Table S2.</b> Variables and the respective time frame used in the second .....                                                                                                                                       | 4  |
| <b>Table S3.</b> ICD-9-CM/ICD-10-CM Codes used to ischemic stroke and risk factors/comorbidities .....                                                                                                                  | 5  |
| <b>Table S4.</b> List of variables and the respective counts and percentages in different female groups based on the different age brackets. *<br><i>p&lt;0.05 between cases and control for the age bracket.</i> ..... | 13 |
| <b>Table S5.</b> List of variables and the respective counts and percentages in different male groups based on the different age brackets. * <i>p&lt;0.05<br/>between cases and control for the age bracket.</i> .....  | 14 |
| <b>Table S6.</b> The best model for each age bracket for males and females, as well as optimized model parameters. ....                                                                                                 | 16 |
| <b>Table S7.</b> Studies on young stroke patients with the respective findings and the age cut-point used. ....                                                                                                         | 17 |
| <b>Table S8.</b> Model AUROC and Accuracy for all the models. ....                                                                                                                                                      | 19 |
| <b>Figure S1.</b> Model performance (AUROC and Accuracy) for different models. Performance measures for all the models are listed in Table S8.<br>.....                                                                 | 21 |

Table S1. TRIPOD checklist.

| Section/Topic                |     |     | Checklist Item                                                                                                                                                                                        | PAGE |
|------------------------------|-----|-----|-------------------------------------------------------------------------------------------------------------------------------------------------------------------------------------------------------|------|
| Title and abstract           |     |     |                                                                                                                                                                                                       |      |
| Title                        | 1   | D;V | Identify the study as developing and/or validating a multivariable prediction model, the target population, and the outcome to be predicted.                                                          | 1    |
| Abstract                     | 2   | D;V | Provide a summary of objectives, study design, setting, participants, sample size, predictors, outcome, statistical analysis, results, and conclusions.                                               | 1    |
| Introduction                 |     |     |                                                                                                                                                                                                       |      |
| Background and objectives    | 3a  | D;V | Explain the medical context (including whether diagnostic or prognostic) and rationale for developing or validating the multivariable prediction model, including references to existing models.      | 1-2  |
|                              | 3b  | D;V | Specify the objectives, including whether the study describes the development or validation of the model or both.                                                                                     | 2    |
| Methods                      |     |     |                                                                                                                                                                                                       |      |
| Source of data               | 4a  | D;V | Describe the study design or source of data (e.g., randomized trial, cohort, or registry data), separately for the development and validation data sets, if applicable.                               | 2    |
|                              | 4b  | D;V | Specify the key study dates, including start of accrual; end of accrual; and, if applicable, end of follow-up.                                                                                        | 3    |
| Participants                 | 5a  | D;V | Specify key elements of the study setting (e.g., primary care, secondary care, general population) including number and location of centres.                                                          | 3    |
|                              | 5b  | D;V | Describe eligibility criteria for participants.                                                                                                                                                       | 3    |
|                              | 5c  | D;V | Give details of treatments received, if relevant.                                                                                                                                                     | -    |
| Outcome                      | 6a  | D;V | Clearly define the outcome that is predicted by the prediction model, including how and when assessed.                                                                                                | 3    |
|                              | 6b  | D;V | Report any actions to blind assessment of the outcome to be predicted.                                                                                                                                | -    |
| Predictors                   | 7a  | D;V | Clearly define all predictors used in developing or validating the multivariable prediction model, including how and when they were measured.                                                         | 3    |
|                              | 7b  | D;V | Report any actions to blind assessment of predictors for the outcome and other predictors.                                                                                                            | 3    |
| Sample size                  | 8   | D;V | Explain how the study size was arrived at.                                                                                                                                                            | 3    |
| Missing data                 | 9   | D;V | Describe how missing data were handled (e.g., complete-case analysis, single imputation, multiple imputation) with details of any imputation method.                                                  | 3    |
|                              | 10a | D   | Describe how predictors were handled in the analyses.                                                                                                                                                 | 3-4  |
| Statistical analysis methods | 10b | D   | Specify type of model, all model-building procedures (including any predictor selection), and method for internal validation.                                                                         | 3-4  |
|                              | 10c | V   | For validation, describe how the predictions were calculated.                                                                                                                                         | 3-4  |
|                              | 10d | D;V | Specify all measures used to assess model performance and, if relevant, to compare multiple models.                                                                                                   | -    |
|                              | 10e | V   | Describe any model updating (e.g., recalibration) arising from the validation, if done.                                                                                                               | -    |
| Risk groups                  | 11  | D;V | Provide details on how risk groups were created, if done.                                                                                                                                             | 3-4  |
| Development vs. validation   | 12  | V   | For validation, identify any differences from the development data in setting, eligibility criteria, outcome, and predictors.                                                                         | -    |
| Results                      |     |     |                                                                                                                                                                                                       |      |
|                              | 13a | D;V | Describe the flow of participants through the study, including the number of participants with and without the outcome and, if applicable, a summary of the follow-up time. A diagram may be helpful. | 4    |
| Participants                 | 13b | D;V | Describe the characteristics of the participants (basic demographics, clinical features, available predictors), including the number of participants with missing data for predictors and outcome.    | 4-5  |
|                              | 13c | V   | For validation, show a comparison with the development data of the distribution of important variables (demographics, predictors and outcome).                                                        | -    |
| Model development            | 14a | D   | Specify the number of participants and outcome events in each analysis.                                                                                                                               | 6-7  |
|                              | 14b | D   | If done, report the unadjusted association between each candidate predictor and outcome.                                                                                                              | -    |

|                           |     |     |                                                                                                                                                                                                                         |       |
|---------------------------|-----|-----|-------------------------------------------------------------------------------------------------------------------------------------------------------------------------------------------------------------------------|-------|
| Model specification       | 15a | D   | Present the full prediction model to allow predictions for individuals (i.e., all regression coefficients, and model intercept or baseline survival at a given time point).<br>Explain how to use the prediction model. | 6-7   |
|                           | 15b | D   |                                                                                                                                                                                                                         | 6-7   |
| Model performance         | 16  | D;V | Report performance measures (with CIs) for the prediction model.                                                                                                                                                        |       |
| Model-updating            | 17  | V   | If done, report the results from any model updating (i.e., model specification, model performance).                                                                                                                     | -     |
| <b>Discussion</b>         |     |     |                                                                                                                                                                                                                         |       |
| Limitations               | 18  | D;V | Discuss any limitations of the study (such as nonrepresentative sample, few events per predictor, missing data).                                                                                                        | 9     |
|                           | 19a | V   | For validation, discuss the results with reference to performance in the development data, and any other validation data.                                                                                               | -     |
| Interpretation            | 19b | D;V | Give an overall interpretation of the results, considering objectives, limitations, results from similar studies, and other relevant evidence.                                                                          | 8-9   |
|                           | 20  | D;V | Discuss the potential clinical use of the model and implications for future research.                                                                                                                                   | 9-10  |
| <b>Other information</b>  |     |     |                                                                                                                                                                                                                         |       |
| Supplementary information | 21  | D;V | Provide information about the availability of supplementary resources, such as study protocol, Web calculator, and data sets.                                                                                           | 3, 10 |
| Funding                   | 22  | D;V | Give the source of funding and the role of the funders for the present study.                                                                                                                                           | 10    |

\*Items relevant only to the development of a prediction model are denoted by D, items relating solely to a validation of a prediction model are denoted by V, and items relating to both are denoted D;V. We recommend using the TRIPOD Checklist in conjunction with the TRIPOD Explanation and Elaboration document.

**Table S2.** Variables and the respective time frame used in the second

| <b>VARIABLE</b>                                                                  | <b>EXTRACTION TIME FRAME</b>                  |
|----------------------------------------------------------------------------------|-----------------------------------------------|
| ARTERIOPATHIES                                                                   | Vasculitis                                    |
|                                                                                  | Fibromuscular dysplasia                       |
|                                                                                  | Reversible cerebral vasoconstriction syndrome |
|                                                                                  | Moyamoya                                      |
|                                                                                  | Sickle cell disease                           |
| CHRONIC SYSTEMIC DISORDERS                                                       | Chronic liver disease                         |
|                                                                                  | Chronic lung disease                          |
|                                                                                  | Chronic kidney disease                        |
|                                                                                  | Cirrhosis                                     |
|                                                                                  | End stage renal disease                       |
| HYPERCOAGULABLE STATE                                                            |                                               |
| ATRIAL FIBRILLATION OR FLUTTER (AF)                                              |                                               |
| ALCOHOL DEPENDENCE OR ABUSE                                                      |                                               |
| CONGESTIVE HEART FAILURE (CHF)                                                   |                                               |
| DIABETES MELLITUS (DM)                                                           |                                               |
| DRUG DEPENDENCE AND ABUSE                                                        |                                               |
| FAMILY HISTORY OF HEART DISEASE AND/OR FAMILY HISTORY OF STROKE (FAMILY HISTORY) |                                               |
| MYOCARDIAL INFARCTION (MI)                                                       |                                               |
| PERIPHERAL VASCULAR DISEASE (PVD)                                                |                                               |
| PATENT FORAMEN OVALE (PFO)                                                       |                                               |
| SMOKING STATUS                                                                   |                                               |
| ELEVATED BODY MASS INDEX (BMI)                                                   |                                               |
| CERVICOCEPHALIC ARTERIAL DISSECTION                                              |                                               |
| NEOPLASM                                                                         |                                               |
| RHEUMATIC DISEASE                                                                |                                               |
| MIGRAINE                                                                         |                                               |
| TEMPORAL ARTERITIS / GIANT CELL ARTERITIS (GCA)                                  |                                               |
| HYPERTENSION                                                                     |                                               |
| DYSLIPIDEMIA                                                                     |                                               |
| MOOD DISORDER (DEPRESSION, BIPOLAR)                                              |                                               |
| ANXIETY DISORDER                                                                 |                                               |

**Table S3.** ICD-9-CM/ICD-10-CM Codes used to ischemic stroke and risk factors/comorbidities

| VARIABLE NAME                                    | VARIABLE TYPE | UNIT/FORMAT/LEVELS                   | VARIABLE DESCRIPTION                                                                                                                                                                        | ICD-9-CM CODE                                                          | ICD-10-CM CODE                                                                                                                                                                                                                                                                                                                                                                                                                                                                                                                                                                                                                                                                                                                                                                                                                                                                                                                                                                                                     |
|--------------------------------------------------|---------------|--------------------------------------|---------------------------------------------------------------------------------------------------------------------------------------------------------------------------------------------|------------------------------------------------------------------------|--------------------------------------------------------------------------------------------------------------------------------------------------------------------------------------------------------------------------------------------------------------------------------------------------------------------------------------------------------------------------------------------------------------------------------------------------------------------------------------------------------------------------------------------------------------------------------------------------------------------------------------------------------------------------------------------------------------------------------------------------------------------------------------------------------------------------------------------------------------------------------------------------------------------------------------------------------------------------------------------------------------------|
| <b>PATIENT ID</b>                                | String        | Format: PT#####                      | Unique ID assigned to de-identified patients                                                                                                                                                | n/a                                                                    | n/a                                                                                                                                                                                                                                                                                                                                                                                                                                                                                                                                                                                                                                                                                                                                                                                                                                                                                                                                                                                                                |
| <b>PATIENT SEX/GENDER</b>                        | Categorical   | Levels:<br>Female<br>Male            | Patient's Sex/Gender as recorded in patient's Electronic Health Records (EHR).                                                                                                              | n/a                                                                    | n/a                                                                                                                                                                                                                                                                                                                                                                                                                                                                                                                                                                                                                                                                                                                                                                                                                                                                                                                                                                                                                |
| <b>INDEX STROKE DATE</b>                         | Date          | YYYY-MM-DD                           | Date of first encounter at Geisinger in which:<br>a) primary diagnosis was ischemic stroke, and<br>b) MRI was available in the encounter, and<br>c) length of stay was at least 24 hours    | n/a                                                                    | n/a                                                                                                                                                                                                                                                                                                                                                                                                                                                                                                                                                                                                                                                                                                                                                                                                                                                                                                                                                                                                                |
| <b>ICD CODE AT INDEX STROKE DATE</b>             | String        |                                      | ICD-9-CM or ICD-10-CM codes used for the primary diagnosis                                                                                                                                  | 433.01, 433.11, 433.21, 433.31, 433.81, 433.91, 434.01, 434.11, 434.91 | I63, I63.0, I63.00, I63.01, I63.011, I63.012, I63.013, I63.019, I63.02, I63.03, I63.031, I63.032, I63.033, I63.039, I63.09, I63.1, I63.10, I63.11, I63.111, I63.112, I63.113, I63.119, I63.12, I63.13, I63.131, I63.132, I63.133, I63.139, I63.19, I63.2, I63.20, I63.21, I63.211, I63.212, I63.213, I63.219, I63.22, I63.23, I63.231, I63.232, I63.233, I63.239, I63.29, I63.3, I63.30, I63.31, I63.311, I63.312, I63.313, I63.319, I63.32, I63.321, I63.322, I63.323, I63.329, I63.33, I63.331, I63.332, I63.333, I63.339, I63.34, I63.341, I63.342, I63.343, I63.349, I63.39, I63.4, I63.40, I63.41, I63.411, I63.412, I63.413, I63.419, I63.42, I63.421, I63.422, I63.423, I63.429, I63.43, I63.431, I63.432, I63.433, I63.439, I63.44, I63.441, I63.442, I63.443, I63.449, I63.49, I63.5, I63.50, I63.51, I63.511, I63.512, I63.513, I63.519, I63.52, I63.521, I63.522, I63.523, I63.529, I63.53, I63.531, I63.532, I63.533, I63.539, I63.54, I63.541, I63.542, I63.543, I63.549, I63.59, I63.6, I63.8, I63.9 |
| <b>NAME OF THE ICD CODE AT INDEX STROKE DATE</b> | String        |                                      | Corresponding primary diagnosis based on the ICD code used                                                                                                                                  | n/a                                                                    | n/a                                                                                                                                                                                                                                                                                                                                                                                                                                                                                                                                                                                                                                                                                                                                                                                                                                                                                                                                                                                                                |
| <b>PATIENT'S AGE AT INDEX STROKE DATE</b>        | Numerical     | Unit: Years                          | Age of the patient at the Index Stroke Date; determined from Patient's Birthdate and Index Stroke Date<br><br>Comments: Changed to 89 if value greater than 89 as part of de-identification | n/a                                                                    | n/a                                                                                                                                                                                                                                                                                                                                                                                                                                                                                                                                                                                                                                                                                                                                                                                                                                                                                                                                                                                                                |
| <b>ISCHEMIC STROKE</b>                           | Categorical   | Levels:<br>0 = Absent<br>1 = Present | Patients with ischemic stroke were included in study                                                                                                                                        | 433.01, 433.11, 433.21, 433.31, 433.81, 433.91, 434.01, 434.11, 434.91 | I63, I63.0, I63.00, I63.01, I63.011, I63.012, I63.013, I63.019, I63.02, I63.03, I63.031, I63.032, I63.033, I63.039, I63.09, I63.1, I63.10, I63.11, I63.111, I63.112, I63.113, I63.119, I63.12, I63.13, I63.131, I63.132, I63.133, I63.139, I63.19, I63.2, I63.20, I63.21, I63.211, I63.212, I63.213, I63.219, I63.22, I63.23, I63.231, I63.232, I63.233, I63.239, I63.29, I63.3, I63.30, I63.31, I63.311, I63.312, I63.313, I63.319, I63.32, I63.321, I63.322, I63.323, I63.329, I63.33, I63.331, I63.332, I63.333, I63.339, I63.34, I63.341, I63.342, I63.343, I63.349, I63.39, I63.4, I63.40, I63.41, I63.411, I63.412, I63.413, I63.419, I63.42, I63.421, I63.422, I63.423, I63.429, I63.43, I63.431, I63.432, I63.433, I63.439, I63.44, I63.441, I63.442, I63.443, I63.449, I63.49, I63.5, I63.50, I63.51, I63.511, I63.512, I63.513, I63.519, I63.52, I63.521, I63.522, I63.523, I63.529, I63.53, I63.531, I63.532, I63.533, I63.539, I63.54, I63.541, I63.542, I63.543, I63.549, I63.59, I63.6, I63.8, I63.9 |

|                                                     |                                     |                                         |                                                                                                       |                                                                                                                                                                                                                                                                                                                                                                                                                                                                                                                                                                                                                                                                                                                             |                                                                                                                                                                                                                                                                                                                                                                                                                                                                                                                                                                                                                                                                                                                                                                                                                                                                                                                                                                                                                                                                                                                                                                                                                                                                                                                                                                                                                                                                                                                                                                                                                                                                                                                                                                                                                                                                                                                                                                                                                                                                                                                                                                                                                                                                                                                                                                                                                                                                                                                                                                                                                                                                                                                                                                                                                                                                                             |
|-----------------------------------------------------|-------------------------------------|-----------------------------------------|-------------------------------------------------------------------------------------------------------|-----------------------------------------------------------------------------------------------------------------------------------------------------------------------------------------------------------------------------------------------------------------------------------------------------------------------------------------------------------------------------------------------------------------------------------------------------------------------------------------------------------------------------------------------------------------------------------------------------------------------------------------------------------------------------------------------------------------------------|---------------------------------------------------------------------------------------------------------------------------------------------------------------------------------------------------------------------------------------------------------------------------------------------------------------------------------------------------------------------------------------------------------------------------------------------------------------------------------------------------------------------------------------------------------------------------------------------------------------------------------------------------------------------------------------------------------------------------------------------------------------------------------------------------------------------------------------------------------------------------------------------------------------------------------------------------------------------------------------------------------------------------------------------------------------------------------------------------------------------------------------------------------------------------------------------------------------------------------------------------------------------------------------------------------------------------------------------------------------------------------------------------------------------------------------------------------------------------------------------------------------------------------------------------------------------------------------------------------------------------------------------------------------------------------------------------------------------------------------------------------------------------------------------------------------------------------------------------------------------------------------------------------------------------------------------------------------------------------------------------------------------------------------------------------------------------------------------------------------------------------------------------------------------------------------------------------------------------------------------------------------------------------------------------------------------------------------------------------------------------------------------------------------------------------------------------------------------------------------------------------------------------------------------------------------------------------------------------------------------------------------------------------------------------------------------------------------------------------------------------------------------------------------------------------------------------------------------------------------------------------------------|
| <b>ATRIAL FIBRILLATION / FLUTTER (AFIB/FLUTTER)</b> | Categorical                         | Levels:<br>0 = Absent<br>1 = Present    | Presence of atrial fibrillation or flutter at time of index stroke or within 3 months of index stroke | 427.3, 427.31, 427.32                                                                                                                                                                                                                                                                                                                                                                                                                                                                                                                                                                                                                                                                                                       | I48, I48.0, I48.1, I48.11, I48.19, I48.2, I48.20, I48.21, I48.9, I48.91, I48.3, I48.4, I48.92                                                                                                                                                                                                                                                                                                                                                                                                                                                                                                                                                                                                                                                                                                                                                                                                                                                                                                                                                                                                                                                                                                                                                                                                                                                                                                                                                                                                                                                                                                                                                                                                                                                                                                                                                                                                                                                                                                                                                                                                                                                                                                                                                                                                                                                                                                                                                                                                                                                                                                                                                                                                                                                                                                                                                                                               |
| <b>ALCOHOL DEPENDANCE OR ABUSE</b>                  | Categorical                         | Levels:<br>0 = Absent<br>1 = Present    | Presence of alcohol dependence of abuse at time of index stroke                                       | 305.0, 305.00, 305.01, 305.02, 305.03                                                                                                                                                                                                                                                                                                                                                                                                                                                                                                                                                                                                                                                                                       | F10.1, F10.10, F10.11, F10.12, F10.120, F10.121, F10.129, F10.14, F10.15, F10.150, F10.151, F10.159, F10.18, F10.180, F10.181, F10.182, F10.188, F10.19, F10.2, F10.20, F10.21, F10.22, F10.220, F10.221, F10.229, F10.23, F10.230, F10.231, F10.232, F10.239, F10.24, F10.25, F10.250, F10.251, F10.259, F10.26, F10.27, F10.28, F10.280, F10.281, F10.282, F10.288, F10.29, F10.9, F10.92, F10.920, F10.921, F10.929, F10.94, F10.95, F10.950, F10.951, F10.959, F10.96, F10.97, F10.98, F10.980, F10.981, F10.982, F10.988, F10.99                                                                                                                                                                                                                                                                                                                                                                                                                                                                                                                                                                                                                                                                                                                                                                                                                                                                                                                                                                                                                                                                                                                                                                                                                                                                                                                                                                                                                                                                                                                                                                                                                                                                                                                                                                                                                                                                                                                                                                                                                                                                                                                                                                                                                                                                                                                                                       |
| <b>BODY MASS INDEX (BMI)</b>                        | Continuous imputed and dichotomized | Levels:<br>0 = BMI <24<br>1 = BMI >= 24 | Overweight (BMI >24) at index stroke                                                                  | n/a                                                                                                                                                                                                                                                                                                                                                                                                                                                                                                                                                                                                                                                                                                                         | n/a                                                                                                                                                                                                                                                                                                                                                                                                                                                                                                                                                                                                                                                                                                                                                                                                                                                                                                                                                                                                                                                                                                                                                                                                                                                                                                                                                                                                                                                                                                                                                                                                                                                                                                                                                                                                                                                                                                                                                                                                                                                                                                                                                                                                                                                                                                                                                                                                                                                                                                                                                                                                                                                                                                                                                                                                                                                                                         |
| <b>CENTRAL NERVOUS SYSTEM (CNS) NEOPLASM</b>        | Categorical                         | Levels:<br>0 = Absent<br>1 = Present    | Presence of a brain tumor at time of index stroke                                                     | 191, 191.0, 191.1, 191.2, 191.3, 191.4, 191.5, 191.6, 191.7, 191.8, 191.9, 225, 225.0, 225.1, 225.2, 225.3, 225.4, 225.8, 225.9, 239.6, 198.3                                                                                                                                                                                                                                                                                                                                                                                                                                                                                                                                                                               | C71, C71.0, C71.1, C71.2, C71.3, C71.4, C71.5, C71.6, C71.7, C71.8, C71.9, D33, D33.0, D33.1, D33.2, D33.3, D33.4, D33.7, D33.9, C79.3, C79.31, C79.32                                                                                                                                                                                                                                                                                                                                                                                                                                                                                                                                                                                                                                                                                                                                                                                                                                                                                                                                                                                                                                                                                                                                                                                                                                                                                                                                                                                                                                                                                                                                                                                                                                                                                                                                                                                                                                                                                                                                                                                                                                                                                                                                                                                                                                                                                                                                                                                                                                                                                                                                                                                                                                                                                                                                      |
| <b>CERVICAL ARTERY DISSECTION</b>                   | Categorical                         | Levels:<br>0 = Absent<br>1 = Present    | Presence of cervicocephalic arterial dissection at time of index stroke                               | 443.21, 443.24                                                                                                                                                                                                                                                                                                                                                                                                                                                                                                                                                                                                                                                                                                              | I77.71, I77.74                                                                                                                                                                                                                                                                                                                                                                                                                                                                                                                                                                                                                                                                                                                                                                                                                                                                                                                                                                                                                                                                                                                                                                                                                                                                                                                                                                                                                                                                                                                                                                                                                                                                                                                                                                                                                                                                                                                                                                                                                                                                                                                                                                                                                                                                                                                                                                                                                                                                                                                                                                                                                                                                                                                                                                                                                                                                              |
| <b>HEART FAILURE</b>                                | Categorical                         | Levels:<br>0 = Absent<br>1 = Present    | Presence of heart failure at time of index stroke                                                     | 402.01, 402.11, 402.91, 404.01, 404.03, 404.11, 404.13, 404.91, 404.93, 428, 428.0, 428.1, 428.2, 428.20, 428.21, 428.22, 428.23, 428.3, 428.30, 428.31, 428.32, 428.33, 428.4, 428.40, 428.41, 428.42, 428.43, 428.9                                                                                                                                                                                                                                                                                                                                                                                                                                                                                                       | I11.0, I13.0, I13.2, I50, I50.1, I50.2, I50.20, I50.21, I50.22, I50.23, I50.3, I50.30, I50.31, I50.32, I50.33, I50.4, I50.40, I50.41, I50.42, I50.43, I50.8, I50.81, I50.810, I50.811, I50.812, I50.813, I50.814, I50.82, I50.83, I50.84, I50.89, I50.9                                                                                                                                                                                                                                                                                                                                                                                                                                                                                                                                                                                                                                                                                                                                                                                                                                                                                                                                                                                                                                                                                                                                                                                                                                                                                                                                                                                                                                                                                                                                                                                                                                                                                                                                                                                                                                                                                                                                                                                                                                                                                                                                                                                                                                                                                                                                                                                                                                                                                                                                                                                                                                     |
| <b>DIABETES MELLITUS (DM)</b>                       | Categorical                         | Levels:<br>0 = Absent<br>1 = Present    | Presence of diabetes at time of index stroke                                                          | 249, 249.0, 249.00, 249.01, 249.1, 249.10, 249.11, 249.2, 249.20, 249.21, 249.3, 249.30, 249.31, 249.4, 249.40, 249.41, 249.5, 249.50, 249.51, 249.6, 249.60, 249.61, 249.7, 249.70, 249.71, 249.8, 249.80, 249.81, 249.9, 249.90, 249.91, 250, 250.0, 250.00, 250.01, 250.02, 250.03, 250.1, 250.10, 250.11, 250.12, 250.13, 250.2, 250.20, 250.21, 250.22, 250.23, 250.3, 250.30, 250.31, 250.32, 250.33, 250.4, 250.40, 250.41, 250.42, 250.43, 250.5, 250.50, 250.51, 250.52, 250.53, 250.6, 250.60, 250.61, 250.62, 250.63, 250.7, 250.70, 250.71, 250.72, 250.73, 250.8, 250.80, 250.81, 250.82, 250.83, 250.9, 250.90, 250.91, 250.92, 250.93, 357.2, 362.01, 362.02, 362.03, 362.04, 362.05, 362.06, 362.07, 366.41 | E10, E10.1, E10.10, E10.11, E10.2, E10.21, E10.22, E10.29, E10.3, E10.31, E10.311, E10.319, E10.32, E10.321, E10.3211, E10.3212, E10.3213, E10.3219, E10.329, E10.3291, E10.3292, E10.3293, E10.3299, E10.33, E10.331, E10.3311, E10.3312, E10.3313, E10.3319, E10.339, E10.3391, E10.3392, E10.3393, E10.3399, E10.34, E10.341, E10.3411, E10.3412, E10.3413, E10.3419, E10.349, E10.3491, E10.3492, E10.3493, E10.3499, E10.35, E10.351, E10.3511, E10.3512, E10.3513, E10.3519, E10.352, E10.3521, E10.3522, E10.3523, E10.3529, E10.353, E10.3531, E10.3532, E10.3533, E10.3539, E10.354, E10.3541, E10.3542, E10.3543, E10.3549, E10.355, E10.3551, E10.3552, E10.3553, E10.3559, E10.359, E10.3591, E10.3592, E10.3593, E10.3599, E10.36, E10.37, E10.37X1, E10.37X2, E10.37X3, E10.37X9, E10.39, E10.4, E10.40, E10.41, E10.42, E10.43, E10.44, E10.49, E10.5, E10.51, E10.52, E10.59, E10.6, E10.61, E10.610, E10.618, E10.62, E10.620, E10.621, E10.622, E10.628, E10.63, E10.630, E10.638, E10.64, E10.641, E10.649, E10.65, E10.69, E10.8, E10.9, E11, E11.0, E11.00, E11.01, E11.1, E11.10, E11.11, E11.2, E11.21, E11.22, E11.29, E11.3, E11.31, E11.311, E11.319, E11.32, E11.321, E11.3211, E11.3212, E11.3213, E11.3219, E11.329, E11.3291, E11.3292, E11.3293, E11.3299, E11.33, E11.331, E11.3311, E11.3312, E11.3313, E11.3319, E11.339, E11.3391, E11.3392, E11.3393, E11.3399, E11.34, E11.341, E11.3411, E11.3412, E11.3413, E11.3419, E11.349, E11.3491, E11.3492, E11.3493, E11.3499, E11.35, E11.351, E11.3511, E11.3512, E11.3513, E11.3519, E11.352, E11.3521, E11.3522, E11.3523, E11.3529, E11.353, E11.3531, E11.3532, E11.3533, E11.3539, E11.354, E11.3541, E11.3542, E11.3543, E11.3549, E11.355, E11.3551, E11.3552, E11.3553, E11.3559, E11.359, E11.3591, E11.3592, E11.3593, E11.3599, E11.36, E11.37, E11.37X1, E11.37X2, E11.37X3, E11.37X9, E11.39, E11.4, E11.40, E11.41, E11.42, E11.43, E11.44, E11.49, E11.5, E11.51, E11.52, E11.59, E11.6, E11.61, E11.610, E11.618, E11.62, E11.620, E11.621, E11.622, E11.628, E11.63, E11.630, E11.638, E11.64, E11.641, E11.649, E11.65, E11.69, E11.8, E11.9, E08, E08.0, E08.00, E08.01, E08.1, E08.10, E08.11, E08.2, E08.21, E08.22, E08.29, E08.3, E08.31, E08.311, E08.319, E08.32, E08.321, E08.3211, E08.3212, E08.3213, E08.3219, E08.329, E08.3291, E08.3292, E08.3293, E08.3299, E08.33, E08.331, E08.3311, E08.3312, E08.3313, E08.3319, E08.339, E08.3391, E08.3392, E08.3393, E08.3399, E08.34, E08.341, E08.3411, E08.3412, E08.3413, E08.3419, E08.349, E08.3491, E08.3492, E08.3493, E08.3499, E08.35, E08.351, E08.3511, E08.3512, E08.3513, E08.3519, E08.352, E08.3521, E08.3522, E08.3523, E08.3529, E08.353, E08.3531, E08.3532, E08.3533, E08.3539, E08.354, E08.3541, E08.3542, E08.3543, E08.3549, E08.355, E08.3551, E08.3552, E08.3553, E08.3559, E08.359, E08.3591, E08.3592, |

|                                         |             |                                      |                                                                                                                   |                                                                                                                                                                                                                                                                                                                                                                                                                                                                                                                                                                                                                                                                                                                                                                                                                                                                                                                                                                                                                                                                                                                                                                                                                                                                                                                                                                                                                                                                                                                                                                                                                                                                                                                                                                                                                                                                                                                                                                                                                                                                                                                                                                                                                                                                                                                                                                                                                                                                                                                                                                                                                                                                                                                                                                                               |
|-----------------------------------------|-------------|--------------------------------------|-------------------------------------------------------------------------------------------------------------------|-----------------------------------------------------------------------------------------------------------------------------------------------------------------------------------------------------------------------------------------------------------------------------------------------------------------------------------------------------------------------------------------------------------------------------------------------------------------------------------------------------------------------------------------------------------------------------------------------------------------------------------------------------------------------------------------------------------------------------------------------------------------------------------------------------------------------------------------------------------------------------------------------------------------------------------------------------------------------------------------------------------------------------------------------------------------------------------------------------------------------------------------------------------------------------------------------------------------------------------------------------------------------------------------------------------------------------------------------------------------------------------------------------------------------------------------------------------------------------------------------------------------------------------------------------------------------------------------------------------------------------------------------------------------------------------------------------------------------------------------------------------------------------------------------------------------------------------------------------------------------------------------------------------------------------------------------------------------------------------------------------------------------------------------------------------------------------------------------------------------------------------------------------------------------------------------------------------------------------------------------------------------------------------------------------------------------------------------------------------------------------------------------------------------------------------------------------------------------------------------------------------------------------------------------------------------------------------------------------------------------------------------------------------------------------------------------------------------------------------------------------------------------------------------------|
|                                         |             |                                      |                                                                                                                   | E08.3593 , E08.3599 , E08.36 , E08.37 , E08.37X1 , E08.37X2 , E08.37X3 , E08.37X9 , E08.39 , E08.4 , E08.40 , E08.41 , E08.42 , E08.43 , E08.44 , E08.49 , E08.5 , E08.51 , E08.52 , E08.59 , E08.6 , E08.61 , E08.610 , E08.618 , E08.62 , E08.620 , E08.621 , E08.622 , E08.628 , E08.63 , E08.630 , E08.638 , E08.64 , E08.641 , E08.649 , E08.65 , E08.69 , E08.8 , E08.9 , E09 , E09.0 , E09.00 , E09.01 , E09.1 , E09.10 , E09.11 , E09.2 , E09.21 , E09.22 , E09.29 , E09.3 , E09.31 , E09.311 , E09.319 , E09.32 , E09.321 , E09.3211 , E09.3212 , E09.3213 , E09.3219 , E09.329 , E09.3291 , E09.3292 , E09.3293 , E09.3299 , E09.33 , E09.331 , E09.3311 , E09.3312 , E09.3313 , E09.3319 , E09.339 , E09.3391 , E09.3392 , E09.3393 , E09.3399 , E09.34 , E09.341 , E09.3411 , E09.3412 , E09.3413 , E09.3419 , E09.349 , E09.3491 , E09.3492 , E09.3493 , E09.3499 , E09.35 , E09.351 , E09.3511 , E09.3512 , E09.3513 , E09.3519 , E09.352 , E09.3521 , E09.3522 , E09.3523 , E09.3529 , E09.353 , E09.3531 , E09.3532 , E09.3533 , E09.3539 , E09.354 , E09.3541 , E09.3542 , E09.3543 , E09.3549 , E09.355 , E09.3551 , E09.3552 , E09.3553 , E09.3559 , E09.359 , E09.3591 , E09.3592 , E09.3593 , E09.3599 , E09.36 , E09.37 , E09.37X1 , E09.37X2 , E09.37X3 , E09.37X9 , E09.39 , E09.4 , E09.40 , E09.41 , E09.42 , E09.43 , E09.44 , E09.49 , E09.5 , E09.51 , E09.52 , E09.59 , E09.6 , E09.61 , E09.610 , E09.618 , E09.62 , E09.620 , E09.621 , E09.622 , E09.628 , E09.63 , E09.630 , E09.638 , E09.64 , E09.641 , E09.649 , E09.65 , E09.69 , E09.8 , E09.9 , E13 , E13.0 , E13.00 , E13.01 , E13.1 , E13.10 , E13.11 , E13.2 , E13.21 , E13.22 , E13.29 , E13.3 , E13.31 , E13.311 , E13.319 , E13.32 , E13.321 , E13.3211 , E13.3212 , E13.3213 , E13.3219 , E13.329 , E13.3291 , E13.3292 , E13.3293 , E13.3299 , E13.33 , E13.331 , E13.3311 , E13.3312 , E13.3313 , E13.3319 , E13.339 , E13.3391 , E13.3392 , E13.3393 , E13.3399 , E13.34 , E13.341 , E13.3411 , E13.3412 , E13.3413 , E13.3419 , E13.349 , E13.3491 , E13.3492 , E13.3493 , E13.3499 , E13.35 , E13.351 , E13.3511 , E13.3512 , E13.3513 , E13.3519 , E13.352 , E13.3521 , E13.3522 , E13.3523 , E13.3529 , E13.353 , E13.3531 , E13.3532 , E13.3533 , E13.3539 , E13.354 , E13.3541 , E13.3542 , E13.3543 , E13.3549 , E13.355 , E13.3551 , E13.3552 , E13.3553 , E13.3559 , E13.359 , E13.3591 , E13.3592 , E13.3593 , E13.3599 , E13.36 , E13.37 , E13.37X1 , E13.37X2 , E13.37X3 , E13.37X9 , E13.39 , E13.4 , E13.40 , E13.41 , E13.42 , E13.43 , E13.44 , E13.49 , E13.5 , E13.51 , E13.52 , E13.59 , E13.6 , E13.61 , E13.610 , E13.618 , E13.62 , E13.620 , E13.621 , E13.622 , E13.628 , E13.63 , E13.630 , E13.638 , E13.64 , E13.641 , E13.649 , E13.65 , E13.69 , E13.8 , E13.9 |
| <b>DRUG<br/>DEPENDANCE OF<br/>ABUSE</b> | Categorical | Levels:<br>0 = Absent<br>1 = Present | Presence of drug abuse or dependence at time of index stroke<br><br>Opioids<br>Cannabis<br>Cocaine<br>Other drugs | 1.<br>304.0, 304.00, 304.01, 304.02, 304.03, 304.7, 304.70, 304.71, 304.72, 304.73, 305.5, 305.50, 305.51, 305.52, 305.53<br><br>2.<br>304.3, 304.30, 304.31, 304.32, 304.33, 305.2, 305.20, 305.21, 305.22, 305.23<br><br>3.<br>304.2, 304.20, 304.21, 304.22, 304.23, 305.6, 305.60, 305.61, 305.62, 305.63<br><br>4.<br>304.1, 304.10, 304.11, 304.12, 304.13, 304.4, 304.40, 304.41, 304.42, 304.43, 304.5, 304.50, 304.51, 304.52, 304.53, 304.6, 304.60, 304.61, 304.62, 304.63, 304.8, 304.80, 304.81, 304.82, 304.83, 304.9, 304.90, 304.91, 304.92, 304.93, 305.3, 305.30, 305.31, 305.32, 305.33, 305.4, 305.40, 305.41, 305.42, 305.43, 305.7, 305.70, 305.71, 305.72, 305.73, 305.8, 305.80, 305.81, 305.82, 305.83, 305.9, 305.90, 305.91, 305.92, 305.93                                                                                                                                                                                                                                                                                                                                                                                                                                                                                                                                                                                                                                                                                                                                                                                                                                                                                                                                                                                                                                                                                                                                                                                                                                                                                                                                                                                                                                                                                                                                                                                                                                                                                                                                                                                                                                                                                                                                                                                                                        |
|                                         |             |                                      |                                                                                                                   | 1.<br>F11, F11.1, F11.10, F11.11, F11.12, F11.120, F11.121, F11.122, F11.129, F11.14, F11.15, F11.150, F11.151, F11.159, F11.18, F11.181, F11.182, F11.188, F11.19, F11.2, F11.20, F11.21, F11.22, F11.220, F11.221, F11.222, F11.229, F11.23, F11.24, F11.25, F11.250, F11.251, F11.259, F11.28, F11.281, F11.282, F11.288, F11.29, F11.9, F11.90, F11.92, F11.920, F11.921, F11.922, F11.929, F11.93, F11.94, F11.95, F11.950, F11.951, F11.959, F11.98, F11.981, F11.982, F11.988, F11.99<br><br>2.<br>F12, F12.1, F12.10, F12.11, F12.12, F12.120, F12.121, F12.122, F12.129, F12.15, F12.150, F12.151, F12.159, F12.18, F12.180, F12.188, F12.19, F12.2, F12.20, F12.21, F12.22, F12.220, F12.221, F12.222, F12.229, F12.23, F12.25, F12.250, F12.251, F12.259, F12.28, F12.280, F12.288, F12.29, F12.9, F12.90, F12.92, F12.920, F12.921, F12.922, F12.929, F12.93, F12.95, F12.950, F12.951, F12.959, F12.98, F12.980, F12.988, F12.99<br><br>3.<br>F14, F14.1, F14.10, F14.11, F14.12, F14.120, F14.121, F14.122, F14.129, F14.14, F14.15, F14.150, F14.151, F14.159, F14.18, F14.180, F14.181, F14.182, F14.188, F14.19, F14.2, F14.20, F14.21, F14.22, F14.220, F14.221, F14.222, F14.229, F14.23, F14.24, F14.25, F14.250, F14.251, F14.259, F14.28, F14.280, F14.281, F14.282, F14.288, F14.29, F14.9, F14.90, F14.92, F14.920, F14.921, F14.922, F14.929, F14.94, F14.95, F14.950, F14.951, F14.959, F14.98, F14.980, F14.981, F14.982, F14.988, F14.99<br><br>4.<br>F13, F13.1, F13.10, F13.11, F13.12, F13.120, F13.121, F13.129, F13.14, F13.15, F13.150, F13.151, F13.159, F13.18, F13.180, F13.181, F13.182, F13.188, F13.19, F13.2, F13.20, F13.21, F13.22, F13.220, F13.221, F13.229, F13.23, F13.230, F13.231, F13.232, F13.239, F13.24, F13.25, F13.250, F13.251, F13.259, F13.26, F13.27, F13.28, F13.280, F13.281, F13.282, F13.288, F13.29, F13.9, F13.90, F13.92, F13.920, F13.921, F13.929, F13.93, F13.930, F13.931, F13.932, F13.939, F13.94, F13.95, F13.950, F13.951, F13.959, F13.96, F13.97, F13.98, F13.980, F13.981, F13.982, F13.988, F13.99, F15, F15.1, F15.10, F15.11, F15.12, F15.120, F15.121, F15.122, F15.129, F15.14, F15.15, F15.150, F15.151, F15.159, F15.18, F15.180, F15.181, F15.182, F15.188, F15.19, F15.2,                                                                                                                                                                                                                                                                                                                                                                                                                                                                                                                               |

|                                |             |                                      |                                                                                                  |                                                                                                                                                                                                                                                                                                                                                                                                                                                                                                           |                                                                                                                                                                                                                                                                                                                                                                                                                                                                                                                                                                                                                                                                                                                                                                                                                                                                                                                                                                                                                                                                                                                                                                                                                                                                                                                                                                                                                                                                                                                                                                                                                                                                                                                                                                                                                                                                                |
|--------------------------------|-------------|--------------------------------------|--------------------------------------------------------------------------------------------------|-----------------------------------------------------------------------------------------------------------------------------------------------------------------------------------------------------------------------------------------------------------------------------------------------------------------------------------------------------------------------------------------------------------------------------------------------------------------------------------------------------------|--------------------------------------------------------------------------------------------------------------------------------------------------------------------------------------------------------------------------------------------------------------------------------------------------------------------------------------------------------------------------------------------------------------------------------------------------------------------------------------------------------------------------------------------------------------------------------------------------------------------------------------------------------------------------------------------------------------------------------------------------------------------------------------------------------------------------------------------------------------------------------------------------------------------------------------------------------------------------------------------------------------------------------------------------------------------------------------------------------------------------------------------------------------------------------------------------------------------------------------------------------------------------------------------------------------------------------------------------------------------------------------------------------------------------------------------------------------------------------------------------------------------------------------------------------------------------------------------------------------------------------------------------------------------------------------------------------------------------------------------------------------------------------------------------------------------------------------------------------------------------------|
|                                |             |                                      |                                                                                                  |                                                                                                                                                                                                                                                                                                                                                                                                                                                                                                           | F15.20, F15.21, F15.22, F15.220, F15.221, F15.222, F15.229, F15.23, F15.24, F15.25, F15.250, F15.251, F15.259, F15.28, F15.280, F15.281, F15.282, F15.288, F15.29, F15.9, F15.90, F15.92, F15.920, F15.921, F15.922, F15.929, F15.93, F15.94, F15.95, F15.950, F15.951, F15.959, F15.98, F15.980, F15.981, F15.982, F15.988, F15.99, F16, F16.1, F16.10, F16.11, F16.12, F16.120, F16.121, F16.122, F16.129, F16.14, F16.15, F16.150, F16.151, F16.159, F16.18, F16.180, F16.183, F16.188, F16.19, F16.2, F16.20, F16.21, F16.22, F16.220, F16.221, F16.229, F16.24, F16.25, F16.250, F16.251, F16.259, F16.28, F16.280, F16.283, F16.288, F16.29, F16.9, F16.90, F16.92, F16.920, F16.921, F16.929, F16.94, F16.95, F16.950, F16.951, F16.959, F16.98, F16.980, F16.983, F16.988, F16.99, F18, F18.1, F18.10, F18.11, F18.12, F18.120, F18.121, F18.129, F18.14, F18.15, F18.150, F18.151, F18.159, F18.17, F18.18, F18.180, F18.188, F18.19, F18.2, F18.20, F18.21, F18.22, F18.220, F18.221, F18.229, F18.24, F18.25, F18.250, F18.251, F18.259, F18.27, F18.28, F18.280, F18.288, F18.29, F18.9, F18.90, F18.92, F18.920, F18.921, F18.929, F18.94, F18.95, F18.950, F18.951, F18.959, F18.97, F18.98, F18.980, F18.988, F18.99, F19, F19.1, F19.10, F19.11, F19.12, F19.120, F19.121, F19.122, F19.129, F19.14, F19.15, F19.150, F19.151, F19.159, F19.16, F19.17, F19.18, F19.180, F19.181, F19.182, F19.188, F19.19, F19.2, F19.20, F19.21, F19.22, F19.220, F19.221, F19.222, F19.229, F19.23, F19.230, F19.231, F19.232, F19.239, F19.24, F19.25, F19.250, F19.251, F19.259, F19.26, F19.27, F19.28, F19.280, F19.281, F19.282, F19.288, F19.29, F19.9, F19.90, F19.92, F19.920, F19.921, F19.922, F19.929, F19.93, F19.930, F19.931, F19.932, F19.939, F19.94, F19.95, F19.950, F19.951, F19.959, F19.96, F19.97, F19.98, F19.980, F19.981, F19.982, F19.988, F19.99 |
| DYSLIPIDEMIA                   | Categorical | Levels:<br>0 = Absent<br>1 = Present | Presence of dyslipidemia at time of index stroke                                                 | 272.0, 272.1, 272.2, 272.3, 272.4, 272.5                                                                                                                                                                                                                                                                                                                                                                                                                                                                  | E78.0, E78.00, E78.01, E78.1, E78.2, E78.3, E78.4, E78.41, E78.49, E78.5, E78.6                                                                                                                                                                                                                                                                                                                                                                                                                                                                                                                                                                                                                                                                                                                                                                                                                                                                                                                                                                                                                                                                                                                                                                                                                                                                                                                                                                                                                                                                                                                                                                                                                                                                                                                                                                                                |
| FAMILY HISTORY OF STROKE OR MI | Categorical | Levels:<br>0 = Absent<br>1 = Present | Recorded family history of either stroke or MI, or both, at any time in the EHR                  | n/a                                                                                                                                                                                                                                                                                                                                                                                                                                                                                                       | n/a                                                                                                                                                                                                                                                                                                                                                                                                                                                                                                                                                                                                                                                                                                                                                                                                                                                                                                                                                                                                                                                                                                                                                                                                                                                                                                                                                                                                                                                                                                                                                                                                                                                                                                                                                                                                                                                                            |
| HYPERCOAGUABLE STATES          | Categorical | Levels:<br>0 = Absent<br>1 = Present | Presence of a hypercoagulable state at time of index stroke or within 3 months of index stroke   | 289.81, 289.82                                                                                                                                                                                                                                                                                                                                                                                                                                                                                            | D68.5, D68.51, D68.52, D68.59, D68.6, D68.61, D68.62, D68.69                                                                                                                                                                                                                                                                                                                                                                                                                                                                                                                                                                                                                                                                                                                                                                                                                                                                                                                                                                                                                                                                                                                                                                                                                                                                                                                                                                                                                                                                                                                                                                                                                                                                                                                                                                                                                   |
| HYPERTENSION (HTN)             | Categorical | Levels:<br>0 = Absent<br>1 = Present | Presence of hypertension at time of index stroke                                                 | 401, 401.0, 401.1, 401.9, 402, 402.0, 402.00, 402.01, 402.1, 402.10, 402.11, 402.9, 402.90, 402.91, 403, 403.0, 403.00, 403.01, 403.1, 403.10, 403.11, 403.9, 403.90, 403.91, 404, 404.0, 404.00, 404.01, 404.02, 404.03, 404.1, 404.10, 404.11, 404.12, 404.13, 404.9, 404.90, 404.91, 404.92, 404.93, 405, 405.0, 405.01, 405.09, 405.1, 405.11, 405.19, 405.9, 405.91, 405.99                                                                                                                          | I10, I11, I11.0, I11.9, I12, I12.0, I12.9, I13, I13.0, I13.1, I13.10, I13.11, I13.2, I15, I15.0, I15.1, I15.2, I15.8, I15.9, I16, I16.0, I16.1, I16.9                                                                                                                                                                                                                                                                                                                                                                                                                                                                                                                                                                                                                                                                                                                                                                                                                                                                                                                                                                                                                                                                                                                                                                                                                                                                                                                                                                                                                                                                                                                                                                                                                                                                                                                          |
| MYOCARDIAL INFARCTION (MI)     | Categorical | Levels:<br>0 = Absent<br>1 = Present | Presence of MI at the time of index stroke                                                       | 410, 410.0, 410.00, 410.01, 410.02, 410.1, 410.10, 410.11, 410.12, 410.2, 410.20, 410.21, 410.22, 410.3, 410.30, 410.31, 410.32, 410.4, 410.40, 410.41, 410.42, 410.5, 410.50, 410.51, 410.52, 410.6, 410.60, 410.61, 410.62, 410.7, 410.70, 410.71, 410.72, 410.8, 410.80, 410.81, 410.82, 410.9, 410.90, 410.91, 410.92, 412, 429.79                                                                                                                                                                    | I21, I21.0, I21.01, I21.02, I21.09, I21.1, I21.11, I21.19, I21.2, I21.21, I21.29, I21.3, I21.4, I21.9, I21.A, I21.A1, I21.A9, I22, I22.0, I22.1, I22.2, I22.8, I22.9, I23, I23.0, I23.1, I23.2, I23.3, I23.4, I23.5, I23.6, I23.7, I23.8, I25.2                                                                                                                                                                                                                                                                                                                                                                                                                                                                                                                                                                                                                                                                                                                                                                                                                                                                                                                                                                                                                                                                                                                                                                                                                                                                                                                                                                                                                                                                                                                                                                                                                                |
| MIGRAINE                       | Categorical | Levels:<br>0 = Absent<br>1 = Present | Presence of a diagnosis of migraines at the time of index stroke                                 | 346, 346.0, 346.00, 346.01, 346.02, 346.03, 346.1, 346.10, 346.11, 346.12, 346.13, 346.2, 346.20, 346.21, 346.22, 346.23, 346.3, 346.30, 346.31, 346.32, 346.33, 346.4, 346.40, 346.41, 346.42, 346.43, 346.5, 346.50, 346.51, 346.52, 346.53, 346.7, 346.70, 346.71, 346.72, 346.73, 346.8, 346.80, 346.81, 346.82, 346.83, 346.9, 346.90, 346.91, 346.92, 346.93                                                                                                                                        | G43, G43.0, G43.00, G43.001, G43.009, G43.01, G43.011, G43.019, G43.1, G43.10, G43.101, G43.109, G43.11, G43.111, G43.119, G43.4, G43.40, G43.401, G43.409, G43.41, G43.411, G43.419, G43.5, G43.50, G43.501, G43.509, G43.51, G43.511, G43.519, G43.7, G43.70, G43.701, G43.709, G43.71, G43.711, G43.719, G43.A, G43.A0, G43.A1, G43.B, G43.B0, G43.B1, G43.C, G43.C0, G43.C1, G43.D, G43.D0, G43.D1, G43.8, G43.80, G43.801, G43.809, G43.81, G43.811, G43.819, G43.82, G43.821, G43.829, G43.83, G43.831, G43.839, G43.9, G43.90, G43.901, G43.909, G43.91, G43.911, G43.919                                                                                                                                                                                                                                                                                                                                                                                                                                                                                                                                                                                                                                                                                                                                                                                                                                                                                                                                                                                                                                                                                                                                                                                                                                                                                               |
| NON CNS NEOPLASM AT INDEX      | Categorical | Levels:<br>0 = Absent<br>1 = Present | Presence of a neoplasm (non -CNS) at the time of index stroke or within 3 months of index stroke | 140.0, 140.1, 140.4, 140.5, 140.6, 140.8, 140.9, 141.0, 141.1, 141.2, 141.3, 141.4, 141.5, 141.6, 141.8, 141.9, 142.0, 142.1, 142.2, 142.8, 142.9, 143.0, 143.1, 143.8, 143.9, 144.0, 144.1, 144.8, 144.9, 145.0, 145.1, 145.2, 145.3, 145.4, 145.5, 145.6, 145.8, 145.9, 146.0, 146.1, 146.2, 146.3, 146.4, 146.5, 146.6, 146.7, 146.8, 146.9, 147.0, 147.1, 147.2, 147.3, 147.8, 147.9, 148.0, 148.1, 148.2, 148.3, 148.8, 148.9, 149.0, 149.8, 149.9, 150.0, 150.1, 150.2, 150.3, 150.4, 150.5, 150.8, | C00, C00.0, C00.1, C00.2, C00.3, C00.4, C00.5, C00.6, C00.8, C00.9, C01, C02, C02.0, C02.1, C02.2, C02.3, C02.4, C02.8, C02.9, C03, C03.0, C03.1, C03.9, C04, C04.0, C04.1, C04.8, C04.9, C05, C05.0, C05.1, C05.2, C05.8, C05.9, C06, C06.0, C06.1, C06.2, C06.8, C06.80, C06.89, C06.9, C07, C08, C08.0, C08.1, C08.9, C09, C09.0, C09.1, C09.8, C09.9, C10, C10.0, C10.1, C10.2, C10.3, C10.4, C10.8, C10.9, C11, C11.0, C11.1, C11.2, C11.3, C11.8, C11.9, C12, C13, C13.0, C13.1, C13.2, C13.8, C13.9, C14, C14.0, C14.2, C14.8, C15, C15.3, C15.4, C15.5, C15.8, C15.9, C16, C16.0, C16.1, C16.2, C16.3, C16.4, C16.5, C16.6, C16.8, C16.9, C17, C17.0, C17.1, C17.2, C17.3, C17.8, C17.9, C18, C18.0, C18.1, C18.2, C18.3, C18.4, C18.5, C18.6, C18.7, C18.8, C18.9, C19, C20, C21, C21.0, C21.1, C21.2, C21.8, C22, C22.0, C22.1, C22.2,                                                                                                                                                                                                                                                                                                                                                                                                                                                                                                                                                                                                                                                                                                                                                                                                                                                                                                                                                                                                                               |



150.9, 151.0, 151.1, 151.2, 151.3, 151.4, 151.5,  
151.6, 151.8, 151.9, 152.0, 152.1, 152.2, 152.3,  
152.8, 152.9, 153, 153.0, 153.1, 153.2, 153.3,  
153.4, 153.5, 153.6, 153.7, 153.8, 153.9, 154,  
154.0, 154.1, 154.2, 154.3, 154.8, 155.0, 155.1,  
155.2, 156.0, 156.1, 156.2, 156.8, 156.9, 157,  
157.0, 157.1, 157.2, 157.3, 157.4, 157.8, 157.9,  
158, 158.0, 158.8, 158.9, 159, 159.0, 159.1, 159.8,  
159.9, 160.0, 160.1, 160.2, 160.3, 160.4, 160.5,  
160.9, 161.0, 161.1, 161.2, 161.3, 161.8, 161.9,  
162, 162.0, 162.2, 162.3, 162.4, 162.5, 162.8,  
162.9, 163.0, 163.1, 163.8, 163.9, 164.0, 164.1,  
164.2, 164.3, 164.8, 164.9, 165.8, 165.9, 170.0,  
170.1, 170.2, 170.3, 170.4, 170.5, 170.6, 170.7,  
170.8, 170.9, 171.0, 171.2, 171.3, 171.4, 171.5,  
171.6, 171.7, 171.8, 171.9, 172.0, 172.1, 172.2,  
172.3, 172.4, 172.5, 172.6, 172.7, 172.8, 172.9,  
173.0, 173.00, 173.01, 173.02, 173.09, 173.1,  
173.10, 173.11, 173.12, 173.19, 173.2, 173.20,  
173.21, 173.22, 173.29, 173.3, 173.30, 173.31,  
173.32, 173.39, 173.4, 173.40, 173.41, 173.42,  
173.49, 173.5, 173.50, 173.51, 173.52, 173.59,  
173.6, 173.60, 173.61, 173.62, 173.69, 173.7,  
173.70, 173.71, 173.72, 173.79, 173.8, 173.80,  
173.81, 173.82, 173.89, 173.9, 173.90, 173.91,  
173.92, 173.99, 174, 174.0, 174.1, 174.2, 174.3,  
174.4, 174.5, 174.6, 174.8, 174.9, 175.0, 175.9,  
176.0, 176.1, 176.2, 176.3, 176.4, 176.8, 176.9,  
179, 180.0, 180.1, 180.8, 180.9, 181, 182.0, 182.1,  
182.8, 183, 183.0, 183.2, 183.4, 183.5, 183.8,  
183.9, 184.0, 184.1, 184.2, 184.3, 184.4, 184.8,  
184.9, 185, 186.0, 186.9, 187.1, 187.2, 187.3,  
187.4, 187.6, 187.7, 187.8, 187.9, 188.0, 188.1,  
188.2, 188.3, 188.4, 188.5, 188.6, 188.7, 188.8,  
188.9, 189.0, 189.1, 189.2, 189.3, 189.4, 189.8,  
189.9, 190.0, 190.1, 190.2, 190.3, 190.4, 190.5,  
190.6, 190.7, 190.8, 190.9, 193, 194.0, 194.1,  
194.3, 194.4, 194.5, 194.6, 194.8, 194.9, 195.0,  
195.1, 195.2, 195.3, 195.4, 195.5, 195.8, 196.0,  
196.1, 196.2, 196.3, 196.5, 196.6, 196.8, 196.9,  
197.0, 197.1, 197.2, 197.3, 197.4, 197.5, 197.6,  
197.7, 197.8, 198.0, 198.1, 198.2, 198.4, 198.5,  
198.6, 198.7, 198.81, 198.82, 198.89, 199, 199.0,  
199.1, 199.2, 200, 200.00, 200.01, 200.02, 200.03,  
200.04, 200.05, 200.06, 200.08, 200.10, 200.11,  
200.12, 200.13, 200.14, 200.15, 200.16, 200.18,  
200.20, 200.21, 200.22, 200.23, 200.24, 200.27,  
200.28, 200.30, 200.31, 200.32, 200.33, 200.34,  
200.35, 200.37, 200.38, 200.40, 200.41, 200.42,  
200.43, 200.44, 200.45, 200.47, 200.48, 200.50,  
200.51, 200.53, 200.57, 200.58, 200.60, 200.61,  
200.62, 200.63, 200.64, 200.65, 200.68, 200.70,  
200.71, 200.72, 200.73, 200.74, 200.75, 200.77,  
200.78, 200.8, 200.80, 200.81, 200.82, 200.83,  
200.88, 201.00, 201.01, 201.10, 201.12, 201.20,  
201.21, 201.25, 201.26, 201.40, 201.42, 201.43,  
201.44, 201.45, 201.47, 201.48, 201.50, 201.51,  
201.52, 201.53, 201.54, 201.58, 201.60, 201.61,  
201.63, 201.64, 201.68, 201.70, 201.71, 201.72,  
201.73, 201.74, 201.75, 201.78, 201.9, 201.90,  
201.91, 201.92, 201.93, 201.94, 201.95, 201.96,  
201.97, 201.98, 202.00, 202.01, 202.02, 202.03,  
202.04, 202.05, 202.06, 202.07, 202.08, 202.10,  
202.11, 202.12, 202.13, 202.14, 202.15, 202.16,  
202.17, 202.18, 202.20, 202.21, 202.28, 202.30,  
202.31, 202.32, 202.33, 202.34, 202.36, 202.38,  
202.40, 202.42, 202.43, 202.44, 202.47, 202.48,  
202.50, 202.51, 202.58, 202.60, 202.62, 202.63,

C22.3, C22.4, C22.7, C22.8, C22.9, C23, C24, C24.0, C24.1, C24.8, C24.9, C25, C25.0,  
C25.1, C25.2, C25.3, C25.4, C25.7, C25.8, C25.9, C26, C26.0, C26.1, C26.9, C30,  
C30.0, C30.1, C31, C31.0, C31.1, C31.2, C31.3, C31.8, C31.9, C32, C32.0, C32.1,  
C32.2, C32.3, C32.8, C32.9, C33, C34, C34.0, C34.00, C34.01, C34.02, C34.1, C34.10,  
C34.11, C34.12, C34.2, C34.3, C34.30, C34.31, C34.32, C34.3, C34.80, C34.81, C34.82,  
C34.9, C34.90, C34.91, C34.92, C37, C38, C38.0, C38.1, C38.2, C38.3, C38.4, C38.8,  
C39, C39.0, C39.9, C40, C40.0, C40.00, C40.01, C40.02, C40.1, C40.10, C40.11,  
C40.12, C40.2, C40.20, C40.21, C40.22, C40.3, C40.30, C40.31, C40.32, C40.8, C40.80,  
C40.81, C40.82, C40.9, C40.90, C40.91, C40.92, C41, C41.0, C41.1, C41.2, C41.3,  
C41.4, C41.9, C43, C43.0, C43.1, C43.10, C43.11, C43.12, C43.2, C43.20, C43.21,  
C43.22, C43.3, C43.30, C43.31, C43.39, C43.4, C43.5, C43.51, C43.52, C43.59, C43.6,  
C43.60, C43.61, C43.62, C43.7, C43.70, C43.71, C43.72, C43.8, C43.9, C45, C45.0,  
C45.1, C45.2, C45.7, C45.9, C46, C46.0, C46.1, C46.2, C46.3, C46.4, C46.5, C46.50,  
C46.51, C46.52, C46.7, C46.9, C47, C47.0, C47.1, C47.10, C47.11, C47.12, C47.2,  
C47.20, C47.21, C47.22, C47.3, C47.4, C47.5, C47.6, C47.8, C47.9, C48, C48.0, C48.1,  
C48.2, C48.8, C49, C49.0, C49.1, C49.10, C49.11, C49.12, C49.2, C49.20, C49.21,  
C49.22, C49.3, C49.4, C49.5, C49.6, C49.8, C49.9, C49.A, C49.A0, C49.A1, C49.A2,  
C49.A3, C49.A4, C49.A5, C49.A9, C4A, C4A.0, C4A.1, C4A.10, C4A.11, C4A.12,  
C4A.2, C4A.20, C4A.21, C4A.22, C4A.3, C4A.30, C4A.31, C4A.39, C4A.4, C4A.5,  
C4A.51, C4A.52, C4A.59, C4A.6, C4A.60, C4A.61, C4A.62, C4A.7, C4A.70, C4A.71,  
C4A.72, C4A.8, C4A.9, C50, C50.0, C50.01, C50.011, C50.012, C50.019, C50.02,  
C50.021, C50.022, C50.029, C50.1, C50.11, C50.111, C50.112, C50.119, C50.12,  
C50.121, C50.122, C50.129, C50.2, C50.21, C50.211, C50.212, C50.219, C50.22,  
C50.221, C50.222, C50.229, C50.3, C50.31, C50.311, C50.312, C50.319, C50.32,  
C50.321, C50.322, C50.329, C50.4, C50.41, C50.411, C50.412, C50.419, C50.42,  
C50.421, C50.422, C50.429, C50.5, C50.51, C50.511, C50.512, C50.519, C50.52,  
C50.521, C50.522, C50.529, C50.6, C50.61, C50.611, C50.612, C50.619, C50.62,  
C50.621, C50.622, C50.629, C50.8, C50.81, C50.811, C50.812, C50.819, C50.82,  
C50.821, C50.822, C50.829, C50.9, C50.91, C50.911, C50.912, C50.919, C50.92,  
C50.921, C50.922, C50.929, C51, C51.0, C51.1, C51.2, C51.8, C51.9, C52, C53, C53.0,  
C53.1, C53.8, C53.9, C54, C54.0, C54.1, C54.2, C54.3, C54.8, C54.9, C55, C56, C56.1,  
C56.2, C56.9, C57, C57.0, C57.00, C57.01, C57.02, C57.1, C57.10, C57.11, C57.12,  
C57.2, C57.20, C57.21, C57.22, C57.3, C57.4, C57.7, C57.8, C57.9, C58, C60, C60.0,  
C60.1, C60.2, C60.8, C60.9, C61, C62, C62.0, C62.00, C62.01, C62.02, C62.1, C62.10,  
C62.11, C62.12, C62.9, C62.90, C62.91, C62.92, C63, C63.0, C63.00, C63.01, C63.02,  
C63.1, C63.10, C63.11, C63.12, C63.2, C63.7, C63.8, C63.9, C64, C64.1, C64.2, C64.9,  
C65, C65.1, C65.2, C65.9, C66, C66.1, C66.2, C66.9, C67, C67.0, C67.1, C67.2, C67.3,  
C67.4, C67.5, C67.6, C67.7, C67.8, C67.9, C68, C68.0, C68.1, C68.8, C68.9, C69,  
C69.0, C69.00, C69.01, C69.02, C69.1, C69.10, C69.11, C69.12, C69.2, C69.20, C69.21,  
C69.22, C69.3, C69.30, C69.31, C69.32, C69.4, C69.40, C69.41, C69.42, C69.5, C69.50,  
C69.51, C69.52, C69.6, C69.60, C69.61, C69.62, C69.8, C69.80, C69.81, C69.82, C69.9,  
C69.90, C69.91, C69.92, C73, C74, C74.0, C74.00, C74.01, C74.02, C74.1, C74.10,  
C74.11, C74.12, C74.9, C74.90, C74.91, C74.92, C75, C75.0, C75.1, C75.2, C75.3,  
C75.4, C75.5, C75.8, C75.9, C76, C76.0, C76.1, C76.2, C76.3, C76.4, C76.40, C76.41,  
C76.42, C76.5, C76.50, C76.51, C76.52, C76.8, C77, C77.0, C77.1, C77.2, C77.3,  
C77.4, C77.5, C77.8, C77.9, C78, C78.0, C78.00, C78.01, C78.02, C78.1, C78.2, C78.3,  
C78.30, C78.39, C78.4, C78.5, C78.6, C78.7, C78.8, C78.80, C78.89, C79, C79.0,  
C79.00, C79.01, C79.02, C79.1, C79.10, C79.11, C79.19, C79.2, C79.5, C79.51, C79.52,  
C79.6, C79.60, C79.61, C79.62, C79.7, C79.70, C79.71, C79.72, C79.8, C79.81, C79.82,  
C79.89, C79.9, C7A, C7A.0, C7A.00, C7A.01, C7A.010, C7A.011, C7A.012, C7A.019,  
C7A.02, C7A.020, C7A.021, C7A.022, C7A.023, C7A.024, C7A.025, C7A.026,  
C7A.029, C7A.09, C7A.090, C7A.091, C7A.092, C7A.093, C7A.094, C7A.095,  
C7A.096, C7A.098, C7A.1, C7A.8, C7B, C7B.0, C7B.00, C7B.01, C7B.02, C7B.03,  
C7B.04, C7B.09, C7B.1, C7B.8, C80, C80.0, C80.1, C80.2, C81, C81.0, C81.00, C81.01,  
C81.02, C81.03, C81.04, C81.05, C81.06, C81.07, C81.08, C81.09, C81.1, C81.10,  
C81.11, C81.12, C81.13, C81.14, C81.15, C81.16, C81.17, C81.18, C81.19, C81.2,  
C81.20, C81.21, C81.22, C81.23, C81.24, C81.25, C81.26, C81.27, C81.28, C81.29,  
C81.3, C81.30, C81.31, C81.32, C81.33, C81.34, C81.35, C81.36, C81.37, C81.38,  
C81.39, C81.4, C81.40, C81.41, C81.42, C81.43, C81.44, C81.45, C81.46, C81.47,  
C81.48, C81.49, C81.7, C81.70, C81.71, C81.72, C81.73, C81.74, C81.75, C81.76,  
C81.77, C81.78, C81.79, C81.9, C81.90, C81.91, C81.92, C81.93, C81.94, C81.95,  
C81.96, C81.97, C81.98, C81.99, C82, C82.0, C82.00, C82.01, C82.02, C82.03, C82.04,  
C82.05, C82.06, C82.07, C82.08, C82.09, C82.1, C82.10, C82.11, C82.12, C82.13,  
C82.14, C82.15, C82.16, C82.17, C82.18, C82.19, C82.2, C82.20, C82.21, C82.22,  
C82.23, C82.24, C82.25, C82.26, C82.27, C82.28, C82.29, C82.3, C82.30, C82.31,  
C82.32, C82.33, C82.34, C82.35, C82.36, C82.37, C82.38, C82.39, C82.4, C82.40,  
C82.41, C82.42, C82.43, C82.44, C82.45, C82.46, C82.47, C82.48, C82.49, C82.5,  
C82.50, C82.51, C82.52, C82.53, C82.54, C82.55, C82.56, C82.57, C82.58, C82.59,

|                         |             |                                      |                                                                                                                                       |                                                                                                                                                                                                                                                                                                                                                                                                                                                                                                                                                                                                                                                                                                                                                                                                                                                                                                                                                                                                                                                                                                               |                                                                                                                                                                                                                                                                                                                                                                                                                                                                                                                                                                                                                                                                                                                                                                                                                                                                                                                                                                                                                                                                                                                                                                                                                                                                                                                                                                                                                                                                                                                                                                                                                                                                                                                                                                                                                                                                                                                                                                                                                                                                                                                                                                                                                                                                                                                                                                                                                                                                                                                                                                                                                                                                                                                                                                                                                                                                                                                                                                                                                                                                                                                                                                                                                                                                                                                      |
|-------------------------|-------------|--------------------------------------|---------------------------------------------------------------------------------------------------------------------------------------|---------------------------------------------------------------------------------------------------------------------------------------------------------------------------------------------------------------------------------------------------------------------------------------------------------------------------------------------------------------------------------------------------------------------------------------------------------------------------------------------------------------------------------------------------------------------------------------------------------------------------------------------------------------------------------------------------------------------------------------------------------------------------------------------------------------------------------------------------------------------------------------------------------------------------------------------------------------------------------------------------------------------------------------------------------------------------------------------------------------|----------------------------------------------------------------------------------------------------------------------------------------------------------------------------------------------------------------------------------------------------------------------------------------------------------------------------------------------------------------------------------------------------------------------------------------------------------------------------------------------------------------------------------------------------------------------------------------------------------------------------------------------------------------------------------------------------------------------------------------------------------------------------------------------------------------------------------------------------------------------------------------------------------------------------------------------------------------------------------------------------------------------------------------------------------------------------------------------------------------------------------------------------------------------------------------------------------------------------------------------------------------------------------------------------------------------------------------------------------------------------------------------------------------------------------------------------------------------------------------------------------------------------------------------------------------------------------------------------------------------------------------------------------------------------------------------------------------------------------------------------------------------------------------------------------------------------------------------------------------------------------------------------------------------------------------------------------------------------------------------------------------------------------------------------------------------------------------------------------------------------------------------------------------------------------------------------------------------------------------------------------------------------------------------------------------------------------------------------------------------------------------------------------------------------------------------------------------------------------------------------------------------------------------------------------------------------------------------------------------------------------------------------------------------------------------------------------------------------------------------------------------------------------------------------------------------------------------------------------------------------------------------------------------------------------------------------------------------------------------------------------------------------------------------------------------------------------------------------------------------------------------------------------------------------------------------------------------------------------------------------------------------------------------------------------------------|
|                         |             |                                      |                                                                                                                                       | 202.68, 202.70, 202.72, 202.73, 202.74, 202.75, 202.77, 202.78, 202.8, 202.80, 202.81, 202.82, 202.83, 202.84, 202.85, 202.86, 202.87, 202.88, 202.90, 202.91, 202.92, 202.93, 202.94, 202.95, 202.96, 202.97, 202.98, 203, 203.0, 203.00, 203.01, 203.02, 203.10, 203.11, 203.80, 204.00, 204.01, 204.02, 204.1, 204.10, 204.11, 204.12, 204.80, 204.81, 204.90, 204.91, 204.92, 205.00, 205.01, 205.02, 205.1, 205.10, 205.11, 205.12, 205.30, 205.31, 205.80, 205.81, 205.90, 205.91, 206.00, 206.01, 206.02, 206.10, 206.80, 206.81, 206.90, 207.20, 207.21, 207.80, 207.81, 208.0, 208.00, 208.01, 208.02, 208.1, 208.10, 208.11, 208.20, 208.21, 208.80, 208.81, 208.90, 208.91, 208.92, 209.00, 209.01, 209.02, 209.03, 209.10, 209.11, 209.12, 209.13, 209.16, 209.17, 209.20, 209.21, 209.22, 209.23, 209.24, 209.25, 209.26, 209.27, 209.29, 209.30, 209.31, 209.32, 209.33, 209.34, 209.35, 209.36, 209.40, 209.41, 209.43, 209.50, 209.51, 209.52, 209.53, 209.55, 209.56, 209.57, 209.60, 209.61, 209.63, 209.64, 209.65, 209.66, 209.69, 209.70, 209.71, 209.72, 209.73, 209.74, 209.75, 209.79 | C82.6, C82.60, C82.61, C82.62, C82.63, C82.64, C82.65, C82.66, C82.67, C82.68, C82.69, C82.8, C82.80, C82.81, C82.82, C82.83, C82.84, C82.85, C82.86, C82.87, C82.88, C82.89, C82.9, C82.90, C82.91, C82.92, C82.93, C82.94, C82.95, C82.96, C82.97, C82.98, C82.99, C83, C83.0, C83.00, C83.01, C83.02, C83.03, C83.04, C83.05, C83.06, C83.07, C83.08, C83.09, C83.1, C83.10, C83.11, C83.12, C83.13, C83.14, C83.15, C83.16, C83.17, C83.18, C83.19, C83.3, C83.30, C83.31, C83.32, C83.33, C83.34, C83.35, C83.36, C83.37, C83.38, C83.39, C83.5, C83.50, C83.51, C83.52, C83.53, C83.54, C83.55, C83.56, C83.57, C83.58, C83.59, C83.7, C83.70, C83.71, C83.72, C83.73, C83.74, C83.75, C83.76, C83.77, C83.78, C83.79, C83.8, C83.80, C83.81, C83.82, C83.83, C83.84, C83.85, C83.86, C83.87, C83.88, C83.89, C83.9, C83.90, C83.91, C83.92, C83.93, C83.94, C83.95, C83.96, C83.97, C83.98, C83.99, C84, C84.0, C84.00, C84.01, C84.02, C84.03, C84.04, C84.05, C84.06, C84.07, C84.08, C84.09, C84.1, C84.10, C84.11, C84.12, C84.13, C84.14, C84.15, C84.16, C84.17, C84.18, C84.19, C84.4, C84.40, C84.41, C84.42, C84.43, C84.44, C84.45, C84.46, C84.47, C84.48, C84.49, C84.6, C84.60, C84.61, C84.62, C84.63, C84.64, C84.65, C84.66, C84.67, C84.68, C84.69, C84.7, C84.70, C84.71, C84.72, C84.73, C84.74, C84.75, C84.76, C84.77, C84.78, C84.79, C84.9, C84.90, C84.91, C84.92, C84.93, C84.94, C84.95, C84.96, C84.97, C84.98, C84.99, C84.A, C84.A0, C84.A1, C84.A2, C84.A3, C84.A4, C84.A5, C84.A6, C84.A7, C84.A8, C84.A9, C84.Z, C84.Z0, C84.Z1, C84.Z2, C84.Z3, C84.Z4, C84.Z5, C84.Z6, C84.Z7, C84.Z8, C84.Z9, C85, C85.1, C85.10, C85.11, C85.12, C85.13, C85.14, C85.15, C85.16, C85.17, C85.18, C85.19, C85.2, C85.20, C85.21, C85.22, C85.23, C85.24, C85.25, C85.26, C85.27, C85.28, C85.29, C85.8, C85.80, C85.81, C85.82, C85.83, C85.84, C85.85, C85.86, C85.87, C85.88, C85.89, C85.9, C85.90, C85.91, C85.92, C85.93, C85.94, C85.95, C85.96, C85.97, C85.98, C85.99, C88, C88.0, C88.2, C88.3, C88.4, C88.8, C88.9, C90, C90.0, C90.00, C90.01, C90.02, C90.1, C90.10, C90.11, C90.12, C90.2, C90.20, C90.21, C90.22, C90.3, C90.30, C90.31, C90.32, C91, C91.0, C91.00, C91.01, C91.02, C91.1, C91.10, C91.11, C91.12, C91.3, C91.30, C91.31, C91.32, C91.4, C91.40, C91.41, C91.42, C91.5, C91.50, C91.51, C91.52, C91.6, C91.60, C91.61, C91.62, C91.9, C91.90, C91.91, C91.92, C91.A, C91.A0, C91.A1, C91.A2, C91.Z, C91.Z0, C91.Z1, C91.Z2, C92, C92.0, C92.00, C92.01, C92.02, C92.1, C92.10, C92.11, C92.12, C92.2, C92.20, C92.21, C92.22, C92.3, C92.30, C92.31, C92.32, C92.4, C92.40, C92.41, C92.42, C92.5, C92.50, C92.51, C92.52, C92.6, C92.60, C92.61, C92.62, C92.9, C92.90, C92.91, C92.92, C92.A, C92.A0, C92.A1, C92.A2, C92.Z, C92.Z0, C92.Z1, C92.Z2, C93, C93.0, C93.00, C93.01, C93.02, C93.1, C93.10, C93.11, C93.12, C93.3, C93.30, C93.31, C93.32, C93.9, C93.90, C93.91, C93.92, C93.Z, C93.Z0, C93.Z1, C93.Z2, C94, C94.0, C94.00, C94.01, C94.02, C94.2, C94.20, C94.21, C94.22, C94.3, C94.30, C94.31, C94.32, C94.4, C94.40, C94.41, C94.42, C94.6, C94.8, C94.80, C94.81, C94.82, C95, C95.0, C95.00, C95.01, C95.02, C95.1, C95.10, C95.11, C95.12, C95.9, C95.90, C95.91, C95.92, C96, C96.0, C96.2, C96.4, C96.5, C96.6, C96.9, C96.A, C96.Z |
| OTHER<br>ARTERIOPATHIES | Categorical | Levels:<br>0 = Absent<br>1 = Present | Consolidation of the 5 below variables:                                                                                               | 1.<br>437.4, 710.2, 446.4                                                                                                                                                                                                                                                                                                                                                                                                                                                                                                                                                                                                                                                                                                                                                                                                                                                                                                                                                                                                                                                                                     | 1.<br>I67.7                                                                                                                                                                                                                                                                                                                                                                                                                                                                                                                                                                                                                                                                                                                                                                                                                                                                                                                                                                                                                                                                                                                                                                                                                                                                                                                                                                                                                                                                                                                                                                                                                                                                                                                                                                                                                                                                                                                                                                                                                                                                                                                                                                                                                                                                                                                                                                                                                                                                                                                                                                                                                                                                                                                                                                                                                                                                                                                                                                                                                                                                                                                                                                                                                                                                                                          |
|                         |             |                                      | 1. Presence of vasculitis at time of index stroke or within 3 months of index stroke                                                  | 2.<br>447.8                                                                                                                                                                                                                                                                                                                                                                                                                                                                                                                                                                                                                                                                                                                                                                                                                                                                                                                                                                                                                                                                                                   | 2.<br>I77.3                                                                                                                                                                                                                                                                                                                                                                                                                                                                                                                                                                                                                                                                                                                                                                                                                                                                                                                                                                                                                                                                                                                                                                                                                                                                                                                                                                                                                                                                                                                                                                                                                                                                                                                                                                                                                                                                                                                                                                                                                                                                                                                                                                                                                                                                                                                                                                                                                                                                                                                                                                                                                                                                                                                                                                                                                                                                                                                                                                                                                                                                                                                                                                                                                                                                                                          |
|                         |             |                                      | 2. Presence of fibromuscular dysplasia (FMD) at any time in the EHR                                                                   | 3.<br>435.9                                                                                                                                                                                                                                                                                                                                                                                                                                                                                                                                                                                                                                                                                                                                                                                                                                                                                                                                                                                                                                                                                                   | 3.<br>I67.841                                                                                                                                                                                                                                                                                                                                                                                                                                                                                                                                                                                                                                                                                                                                                                                                                                                                                                                                                                                                                                                                                                                                                                                                                                                                                                                                                                                                                                                                                                                                                                                                                                                                                                                                                                                                                                                                                                                                                                                                                                                                                                                                                                                                                                                                                                                                                                                                                                                                                                                                                                                                                                                                                                                                                                                                                                                                                                                                                                                                                                                                                                                                                                                                                                                                                                        |
|                         |             |                                      | 3. Presence of reversible cerebrovascular vasoconstriction syndrome (RCVS) at time of index stroke or within 3 months of index stroke | 4.<br>437.5                                                                                                                                                                                                                                                                                                                                                                                                                                                                                                                                                                                                                                                                                                                                                                                                                                                                                                                                                                                                                                                                                                   | 4.<br>I67.5                                                                                                                                                                                                                                                                                                                                                                                                                                                                                                                                                                                                                                                                                                                                                                                                                                                                                                                                                                                                                                                                                                                                                                                                                                                                                                                                                                                                                                                                                                                                                                                                                                                                                                                                                                                                                                                                                                                                                                                                                                                                                                                                                                                                                                                                                                                                                                                                                                                                                                                                                                                                                                                                                                                                                                                                                                                                                                                                                                                                                                                                                                                                                                                                                                                                                                          |
|                         |             |                                      | 4. Presence of moyamoya at any time in the EHR                                                                                        | 5.<br>282.41, 282.42, 282.6, 282.61, 282.62, 282.63, 282.64, 282.68, 289.52                                                                                                                                                                                                                                                                                                                                                                                                                                                                                                                                                                                                                                                                                                                                                                                                                                                                                                                                                                                                                                   | 5.<br>D57.00, D57.02, D57.1, D57.20, D57.211, D57.212, D57.219, D57.40, D57.419, D57.80, D57.819                                                                                                                                                                                                                                                                                                                                                                                                                                                                                                                                                                                                                                                                                                                                                                                                                                                                                                                                                                                                                                                                                                                                                                                                                                                                                                                                                                                                                                                                                                                                                                                                                                                                                                                                                                                                                                                                                                                                                                                                                                                                                                                                                                                                                                                                                                                                                                                                                                                                                                                                                                                                                                                                                                                                                                                                                                                                                                                                                                                                                                                                                                                                                                                                                     |
|                         |             |                                      | 5. Presence of sickle cell disease (SCD) at any time in the EHR                                                                       |                                                                                                                                                                                                                                                                                                                                                                                                                                                                                                                                                                                                                                                                                                                                                                                                                                                                                                                                                                                                                                                                                                               |                                                                                                                                                                                                                                                                                                                                                                                                                                                                                                                                                                                                                                                                                                                                                                                                                                                                                                                                                                                                                                                                                                                                                                                                                                                                                                                                                                                                                                                                                                                                                                                                                                                                                                                                                                                                                                                                                                                                                                                                                                                                                                                                                                                                                                                                                                                                                                                                                                                                                                                                                                                                                                                                                                                                                                                                                                                                                                                                                                                                                                                                                                                                                                                                                                                                                                                      |

|                                                  |             |                                      |                                                                                                                                                                                                                                                                                                                                                                                                                                                             |                                                                                                                                                                                                                                                                                                                                                                                                                                                                                                                                                                                                                                                                                                                                                                                                                                                                                                                                                                                                                                                                                                                                                                                                                               |                                                                                                                                                                                                                                                                                                                                                                                                                                                                                                                                                                                                                                                                                                                                                                                                                                                                                                                                                                                                                                                                                                                                                                                                                                                                                                                                                                                                                                                                                                                                                                                                                                                                                                                                                                                                                                                                                                                                                                                                                                                                                                                                                                                                                                                                                                                                                                                                                                                                                                                                                                                                                                                                                                                                                                                                                                                                        |
|--------------------------------------------------|-------------|--------------------------------------|-------------------------------------------------------------------------------------------------------------------------------------------------------------------------------------------------------------------------------------------------------------------------------------------------------------------------------------------------------------------------------------------------------------------------------------------------------------|-------------------------------------------------------------------------------------------------------------------------------------------------------------------------------------------------------------------------------------------------------------------------------------------------------------------------------------------------------------------------------------------------------------------------------------------------------------------------------------------------------------------------------------------------------------------------------------------------------------------------------------------------------------------------------------------------------------------------------------------------------------------------------------------------------------------------------------------------------------------------------------------------------------------------------------------------------------------------------------------------------------------------------------------------------------------------------------------------------------------------------------------------------------------------------------------------------------------------------|------------------------------------------------------------------------------------------------------------------------------------------------------------------------------------------------------------------------------------------------------------------------------------------------------------------------------------------------------------------------------------------------------------------------------------------------------------------------------------------------------------------------------------------------------------------------------------------------------------------------------------------------------------------------------------------------------------------------------------------------------------------------------------------------------------------------------------------------------------------------------------------------------------------------------------------------------------------------------------------------------------------------------------------------------------------------------------------------------------------------------------------------------------------------------------------------------------------------------------------------------------------------------------------------------------------------------------------------------------------------------------------------------------------------------------------------------------------------------------------------------------------------------------------------------------------------------------------------------------------------------------------------------------------------------------------------------------------------------------------------------------------------------------------------------------------------------------------------------------------------------------------------------------------------------------------------------------------------------------------------------------------------------------------------------------------------------------------------------------------------------------------------------------------------------------------------------------------------------------------------------------------------------------------------------------------------------------------------------------------------------------------------------------------------------------------------------------------------------------------------------------------------------------------------------------------------------------------------------------------------------------------------------------------------------------------------------------------------------------------------------------------------------------------------------------------------------------------------------------------------|
| <b>CHRONIC<br/>SYSTEMIC<br/>DISORDERS</b>        | Categorical | Levels:<br>0 = Absent<br>1 = Present | Consolidation of the 5<br>below variables:<br><br>1. Presence of chronic<br>liver disease at time of<br>index stroke<br>2. Presence of chronic<br>lung disease at time of<br>index stroke<br>3. Presence of chronic<br>kidney disease (CKD)<br>at time of index stroke<br>4. Presence of end<br>stage renal disease<br>(ESRD) at time of<br>index stroke<br>5. Presence of<br>cirrhosis at time of<br>index stroke or within<br>3 months of index<br>stroke | 1.<br>070.32, 070.33, 070.54, 070.9 , 570, 571.0, 571.2,<br>571.3, 571.4, 571.40, 571.41, 571.42, 571.49,<br>571.5, 571.6, 571.8, 571.9, 573.3 , 573.4, 070.22,<br>070.23, 070.44, 070.6, 456.0, 456.1, 456.2, 456.20,<br>456.21, 567.23, 572.1, 572.2, 572.3, 572.4, 572.8<br><br>2.<br>490, 491, 491.0, 491.1, 491.2, 491.20, 491.21,<br>491.22, 491.8, 491.9, 492, 492.0, 492.8, 493, 493.0,<br>493.00, 493.01, 493.02, 493.1, 493.10, 493.11,<br>493.12, 493.2, 493.20, 493.21, 493.22, 493.8,<br>493.81, 493.82, 493.9, 493.90, 493.91, 493.92, 494,<br>494.0, 494.1, 495, 495.0, 495.1, 495.2, 495.3,<br>495.4, 495.5, 495.6, 495.7, 495.8, 495.9, 496, 500,<br>501, 502, 503, 504, 505, 506.4, 508.1<br><br>3.<br>403.00, 403.01, 403.10, 403.11, 403.90, 403.91,<br>404.00, 404.01, 404.02, 404.03, 404.10, 404.11,<br>404.12, 404.13, 404.90, 404.91, 404.92, 404.93,<br>585, 585.1, 585.2, 585.3, 585.4, 585.5, 585.6,<br>585.9, 586<br><br>4. 585.6<br><br>5. 571.2, 571.5, 571.6<br>440, 440.0, 440.1, 440.2, 440.20, 440.21, 440.22,<br>440.23, 440.24, 440.29, 440.3, 440.30, 440.31,<br>440.32, 440.4, 440.8, 440.9, 443.0, 443.1, 443.8,<br>443.81, 443.82, 443.89, 443.9, 447.1, 557, 557.0,<br>557.1, 557.9 | 1.<br>B18, B18.0, B18.1, B18.2, B18.8, B18.9, K70.0, K70.1, K70.10, K70.2, K70.3, K70.30,<br>K70.9, K71.3, K71.4, K71.5, K71.7, K73, K73.0, K73.1, K73.2, K73.8, K73.9, K74,<br>K74.0, K74.1, K74.2, K74.3, K74.4, K74.5, K74.6, K74.60, K74.69, K76.0, K76.2,<br>K76.3, K76.4, K76.8, K76.9, Z94.4 I85.0, I86.4, K70.11, K70.31, K70.4, K70.40,<br>K70.41, K71.1, K72.1, K72.9, K76.5, K76.6, K76.7<br><br>2.<br>J40, J41, J41.0, J41.1, J41.8, J42, J43, J43.0, J43.1, J43.2, J43.8, J43.9, J44, J44.0, J44.1,<br>J44.9, J45, J45.2, J45.20, J45.21, J45.22, J45.3, J45.30, J45.31, J45.32, J45.4, J45.40,<br>J45.41, J45.42, J45.5, J45.50, J45.51, J45.52, J45.9, J45.90, J45.901, J45.902, J45.909,<br>J45.99, J45.990, J45.991, J45.998, J47, J47.0, J47.1, J47.9, J60, J61, J62, J62.0, J62.8,<br>J63, J63.0, J63.1, J63.2, J63.3, J63.4, J63.5, J63.6, J64, J65, J66, J66.0, J66.1, J66.2,<br>J66.8, J67, J67.0, J67.1, J67.2, J67.3, J67.4, J67.5, J67.6, J67.7, J67.8, J67.9, J68.4, J70.1,<br>J70.3<br><br>3.<br>I12, I12.0, I12.9, I13, I13.0, I13.1, I13.10, I13.11, I13.2, N18, N18.1, N18.2, N18.3,<br>N18.4, N18.5, N18.6, N18.9, N19, Z49.0, Z94.0, Z99.2<br><br>4. N18.6<br><br>5. K74, K74.0, K74.1, K74.2, K74.3, K74.4, K74.5, K74.6, K74.60, K74.69                                                                                                                                                                                                                                                                                                                                                                                                                                                                                                                                                                                                                                                                                                                                                                                                                                                                                                                                                                                                                                                                                                                                                                                                                                                                                                                                                                                                                                                                                                                                                                                              |
| <b>PERIPHERAL<br/>VASCULAR<br/>DISEASE (PVD)</b> | Categorical | Levels:<br>0 = Absent<br>1 = Present | Presence of peripheral<br>vascular disease at<br>time of index stroke or<br>within 3 months of<br>index stroke                                                                                                                                                                                                                                                                                                                                              | 440, 440.0, 440.1, 440.2, 440.20, 440.21, 440.22,<br>440.23, 440.24, 440.29, 440.3, 440.30, 440.31,<br>440.32, 440.4, 440.8, 440.9, 443.0, 443.1, 443.8,<br>443.81, 443.82, 443.89, 443.9, 447.1, 557, 557.0,<br>557.1, 557.9                                                                                                                                                                                                                                                                                                                                                                                                                                                                                                                                                                                                                                                                                                                                                                                                                                                                                                                                                                                                 | I70, I70.0, I70.1, I70.2, I70.20, I70.201, I70.202, I70.203, I70.208, I70.209, I70.21,<br>I70.211, I70.212, I70.213, I70.218, I70.219, I70.22, I70.221, I70.222, I70.223, I70.228,<br>I70.229, I70.23, I70.231, I70.232, I70.233, I70.234, I70.235, I70.238, I70.239, I70.24,<br>I70.241, I70.242, I70.243, I70.244, I70.245, I70.248, I70.249, I70.25, I70.26, I70.261,<br>I70.262, I70.263, I70.268, I70.269, I70.29, I70.291, I70.292, I70.293, I70.298, I70.299,<br>I70.3, I70.30, I70.301, I70.302, I70.303, I70.308, I70.309, I70.31, I70.311, I70.312,<br>I70.313, I70.318, I70.319, I70.32, I70.321, I70.322, I70.323, I70.328, I70.329, I70.33,<br>I70.331, I70.332, I70.333, I70.334, I70.335, I70.338, I70.339, I70.34, I70.341, I70.342,<br>I70.343, I70.344, I70.345, I70.348, I70.349, I70.35, I70.36, I70.361, I70.362, I70.363,<br>I70.368, I70.369, I70.39, I70.391, I70.392, I70.393, I70.398, I70.399, I70.4, I70.40,<br>I70.401, I70.402, I70.403, I70.408, I70.409, I70.41, I70.411, I70.412, I70.413, I70.418,<br>I70.419, I70.42, I70.421, I70.422, I70.423, I70.428, I70.429, I70.43, I70.431, I70.432,<br>I70.433, I70.434, I70.435, I70.438, I70.439, I70.44, I70.441, I70.442, I70.443, I70.444,<br>I70.445, I70.448, I70.449, I70.45, I70.46, I70.461, I70.462, I70.463, I70.468, I70.469,<br>I70.49, I70.491, I70.492, I70.493, I70.498, I70.499, I70.5, I70.50, I70.501, I70.502,<br>I70.503, I70.508, I70.509, I70.51, I70.511, I70.512, I70.513, I70.518, I70.519, I70.52,<br>I70.521, I70.522, I70.523, I70.528, I70.529, I70.53, I70.531, I70.532, I70.533, I70.534,<br>I70.535, I70.538, I70.539, I70.54, I70.541, I70.542, I70.543, I70.544, I70.545, I70.548,<br>I70.549, I70.55, I70.56, I70.561, I70.562, I70.563, I70.568, I70.569, I70.59, I70.591,<br>I70.592, I70.593, I70.598, I70.599, I70.6, I70.60, I70.601, I70.602, I70.603, I70.608,<br>I70.609, I70.61, I70.611, I70.612, I70.613, I70.618, I70.619, I70.62, I70.621, I70.622,<br>I70.623, I70.628, I70.629, I70.63, I70.631, I70.632, I70.633, I70.634, I70.635, I70.638,<br>I70.639, I70.64, I70.641, I70.642, I70.643, I70.644, I70.645, I70.648, I70.649, I70.65,<br>I70.66, I70.661, I70.662, I70.663, I70.668, I70.669, I70.69, I70.691, I70.692, I70.693,<br>I70.698, I70.699, I70.7, I70.70, I70.701, I70.702, I70.703, I70.708, I70.709, I70.71,<br>I70.711, I70.712, I70.713, I70.718, I70.719, I70.72, I70.721, I70.722, I70.723, I70.728,<br>I70.729, I70.73, I70.731, I70.732, I70.733, I70.734, I70.735, I70.738, I70.739, I70.74,<br>I70.741, I70.742, I70.743, I70.744, I70.745, I70.748, I70.749, I70.75, I70.76, I70.761,<br>I70.762, I70.763, I70.768, I70.769, I70.79, I70.791, I70.792, I70.793, I70.798, I70.799,<br>I70.8, I70.9, I70.90, I70.91, I70.92, I73, I73.0, I73.00, I73.01, I73.1, I73.8, I73.81,<br>I73.89, I73.9, I77.1<br>Q21.1 |
| <b>PATENT FORAMEN<br/>OVALE (PFO)</b>            | Categorical | Levels:<br>0 = Absent<br>1 = Present | Presence of PFO at<br>any time in the EHR                                                                                                                                                                                                                                                                                                                                                                                                                   | 745.5                                                                                                                                                                                                                                                                                                                                                                                                                                                                                                                                                                                                                                                                                                                                                                                                                                                                                                                                                                                                                                                                                                                                                                                                                         |                                                                                                                                                                                                                                                                                                                                                                                                                                                                                                                                                                                                                                                                                                                                                                                                                                                                                                                                                                                                                                                                                                                                                                                                                                                                                                                                                                                                                                                                                                                                                                                                                                                                                                                                                                                                                                                                                                                                                                                                                                                                                                                                                                                                                                                                                                                                                                                                                                                                                                                                                                                                                                                                                                                                                                                                                                                                        |
| <b>RHEUMATIC<br/>DISEASES</b>                    | Categorical | Levels:<br>0 = Absent<br>1 = Present | Presence of any<br>rheumatic disease at<br>the time of index<br>stroke or within 3<br>months of index stroke                                                                                                                                                                                                                                                                                                                                                | 710, 710.0, 710.1, 710.2, 710.3, 710.4, 710.5,<br>710.8, 710.9, 714, 714.0, 714.1, 714.2, 714.4,<br>714.8, 714.81, 714.89, 714.9, 725                                                                                                                                                                                                                                                                                                                                                                                                                                                                                                                                                                                                                                                                                                                                                                                                                                                                                                                                                                                                                                                                                         | M05, M05.0, M05.00, M05.01, M05.011, M05.012, M05.019, M05.02, M05.021,<br>M05.022, M05.029, M05.03, M05.031, M05.032, M05.039, M05.04, M05.041,<br>M05.042, M05.049, M05.05, M05.051, M05.052, M05.059, M05.06, M05.061,<br>M05.062, M05.069, M05.07, M05.071, M05.072, M05.079, M05.09, M05.1, M05.10,<br>M05.11, M05.111, M05.112, M05.119, M05.12, M05.121, M05.122, M05.129, M05.13,                                                                                                                                                                                                                                                                                                                                                                                                                                                                                                                                                                                                                                                                                                                                                                                                                                                                                                                                                                                                                                                                                                                                                                                                                                                                                                                                                                                                                                                                                                                                                                                                                                                                                                                                                                                                                                                                                                                                                                                                                                                                                                                                                                                                                                                                                                                                                                                                                                                                              |

|                                            |             |                                         |                                                                                    |     |                                                                                                                                                                                                                                                                                                                                                                                                                                                                                                                                                                                                                                                                                                                                                                                                                                                                                                                                                                                                                                                                                                                                                                                                                                                                                                                                                                                                                                                                                                                                                                                                                                                                                                                                                                                                                                                                                                                                                                                                                                                                                                                                                                                                                                                                                                                                                                                                                                                                                                                                                                                                                                                                                                                                                                                                                                                                                                                                                                                                                                                                                                                                                                                                                                                                                                                                                                                                                                                                                                                                                                                                                                                                                                          |
|--------------------------------------------|-------------|-----------------------------------------|------------------------------------------------------------------------------------|-----|----------------------------------------------------------------------------------------------------------------------------------------------------------------------------------------------------------------------------------------------------------------------------------------------------------------------------------------------------------------------------------------------------------------------------------------------------------------------------------------------------------------------------------------------------------------------------------------------------------------------------------------------------------------------------------------------------------------------------------------------------------------------------------------------------------------------------------------------------------------------------------------------------------------------------------------------------------------------------------------------------------------------------------------------------------------------------------------------------------------------------------------------------------------------------------------------------------------------------------------------------------------------------------------------------------------------------------------------------------------------------------------------------------------------------------------------------------------------------------------------------------------------------------------------------------------------------------------------------------------------------------------------------------------------------------------------------------------------------------------------------------------------------------------------------------------------------------------------------------------------------------------------------------------------------------------------------------------------------------------------------------------------------------------------------------------------------------------------------------------------------------------------------------------------------------------------------------------------------------------------------------------------------------------------------------------------------------------------------------------------------------------------------------------------------------------------------------------------------------------------------------------------------------------------------------------------------------------------------------------------------------------------------------------------------------------------------------------------------------------------------------------------------------------------------------------------------------------------------------------------------------------------------------------------------------------------------------------------------------------------------------------------------------------------------------------------------------------------------------------------------------------------------------------------------------------------------------------------------------------------------------------------------------------------------------------------------------------------------------------------------------------------------------------------------------------------------------------------------------------------------------------------------------------------------------------------------------------------------------------------------------------------------------------------------------------------------------|
|                                            |             |                                         |                                                                                    |     | M05.131, M05.132, M05.139, M05.14, M05.141, M05.142, M05.149, M05.15, M05.151, M05.152, M05.159, M05.16, M05.161, M05.162, M05.169, M05.17, M05.171, M05.172, M05.179, M05.19, M05.2, M05.20, M05.21, M05.211, M05.212, M05.219, M05.22, M05.221, M05.222, M05.229, M05.23, M05.231, M05.232, M05.239, M05.24, M05.241, M05.242, M05.249, M05.25, M05.251, M05.252, M05.259, M05.26, M05.261, M05.262, M05.269, M05.27, M05.271, M05.272, M05.279, M05.29, M05.3, M05.30, M05.31, M05.311, M05.312, M05.319, M05.32, M05.321, M05.322, M05.329, M05.33, M05.331, M05.332, M05.339, M05.34, M05.341, M05.342, M05.349, M05.35, M05.351, M05.352, M05.359, M05.36, M05.361, M05.362, M05.369, M05.37, M05.371, M05.372, M05.379, M05.39, M05.4, M05.40, M05.41, M05.411, M05.412, M05.419, M05.42, M05.421, M05.422, M05.429, M05.43, M05.431, M05.432, M05.439, M05.44, M05.441, M05.442, M05.449, M05.45, M05.451, M05.452, M05.459, M05.46, M05.461, M05.462, M05.469, M05.47, M05.471, M05.472, M05.479, M05.49, M05.5, M05.50, M05.51, M05.511, M05.512, M05.519, M05.52, M05.521, M05.522, M05.529, M05.53, M05.531, M05.532, M05.539, M05.54, M05.541, M05.542, M05.549, M05.55, M05.551, M05.552, M05.559, M05.56, M05.561, M05.562, M05.569, M05.57, M05.571, M05.572, M05.579, M05.59, M05.6, M05.60, M05.61, M05.611, M05.612, M05.619, M05.62, M05.621, M05.622, M05.629, M05.63, M05.631, M05.632, M05.639, M05.64, M05.641, M05.642, M05.649, M05.65, M05.651, M05.652, M05.659, M05.66, M05.661, M05.662, M05.669, M05.67, M05.671, M05.672, M05.679, M05.69, M05.7, M05.70, M05.71, M05.711, M05.712, M05.719, M05.72, M05.721, M05.722, M05.729, M05.73, M05.731, M05.732, M05.739, M05.74, M05.741, M05.742, M05.749, M05.75, M05.751, M05.752, M05.759, M05.76, M05.761, M05.762, M05.769, M05.77, M05.771, M05.772, M05.779, M05.79, M05.8, M05.80, M05.81, M05.811, M05.812, M05.819, M05.82, M05.821, M05.822, M05.829, M05.83, M05.831, M05.832, M05.839, M05.84, M05.841, M05.842, M05.849, M05.85, M05.851, M05.852, M05.859, M05.86, M05.861, M05.862, M05.869, M05.87, M05.871, M05.872, M05.879, M05.89, M05.9, M06, M06.0, M06.00, M06.01, M06.011, M06.012, M06.019, M06.02, M06.021, M06.022, M06.029, M06.03, M06.031, M06.032, M06.039, M06.04, M06.041, M06.042, M06.049, M06.05, M06.051, M06.052, M06.059, M06.06, M06.061, M06.062, M06.069, M06.07, M06.071, M06.072, M06.079, M06.08, M06.09, M06.1, M06.2, M06.20, M06.21, M06.211, M06.212, M06.219, M06.22, M06.221, M06.222, M06.229, M06.23, M06.231, M06.232, M06.239, M06.24, M06.241, M06.242, M06.249, M06.25, M06.251, M06.252, M06.259, M06.26, M06.261, M06.262, M06.269, M06.27, M06.271, M06.272, M06.279, M06.28, M06.29, M06.3, M06.30, M06.31, M06.311, M06.312, M06.319, M06.32, M06.321, M06.322, M06.329, M06.33, M06.331, M06.332, M06.339, M06.34, M06.341, M06.342, M06.349, M06.35, M06.351, M06.352, M06.359, M06.36, M06.361, M06.362, M06.369, M06.37, M06.371, M06.372, M06.379, M06.38, M06.39, M06.4, M06.8, M06.80, M06.81, M06.811, M06.812, M06.819, M06.82, M06.821, M06.822, M06.829, M06.83, M06.831, M06.832, M06.839, M06.84, M06.841, M06.842, M06.849, M06.85, M06.851, M06.852, M06.859, M06.86, M06.861, M06.862, M06.869, M06.87, M06.871, M06.872, M06.879, M06.88, M06.89, M06.9, M31.5, M32, M32.0, M32.1, M32.10, M32.11, M32.12, M32.13, M32.14, M32.15, M32.19, M32.8, M32.9, M33, M33.0, M33.00, M33.01, M33.02, M33.03, M33.09, M33.1, M33.10, M33.11, M33.12, M33.13, M33.19, M33.2, M33.20, M33.21, M33.22, M33.29, M33.9, M33.90, M33.91, M33.92, M33.93, M33.99, M34, M34.0, M34.1, M34.2, M34.8, M34.81, M34.82, M34.83, M34.89, M34.9, M35.1, M35.3, M36.0 |
| <b>SMOKING STATUS</b>                      | Categorical | Levels:<br>0 = nonsmoker<br>1 = smoking | Smoking status at time of index stroke                                             | n/a | n/a                                                                                                                                                                                                                                                                                                                                                                                                                                                                                                                                                                                                                                                                                                                                                                                                                                                                                                                                                                                                                                                                                                                                                                                                                                                                                                                                                                                                                                                                                                                                                                                                                                                                                                                                                                                                                                                                                                                                                                                                                                                                                                                                                                                                                                                                                                                                                                                                                                                                                                                                                                                                                                                                                                                                                                                                                                                                                                                                                                                                                                                                                                                                                                                                                                                                                                                                                                                                                                                                                                                                                                                                                                                                                                      |
| <b>GIANT CELL TEMPORAL ARTERITIS (GCA)</b> | Categorical | Levels:<br>0 = Absent<br>1 = Present    | Presence of any GCA at the time of index stroke or within 3 months of index stroke |     |                                                                                                                                                                                                                                                                                                                                                                                                                                                                                                                                                                                                                                                                                                                                                                                                                                                                                                                                                                                                                                                                                                                                                                                                                                                                                                                                                                                                                                                                                                                                                                                                                                                                                                                                                                                                                                                                                                                                                                                                                                                                                                                                                                                                                                                                                                                                                                                                                                                                                                                                                                                                                                                                                                                                                                                                                                                                                                                                                                                                                                                                                                                                                                                                                                                                                                                                                                                                                                                                                                                                                                                                                                                                                                          |

**Table S4.** List of variables and the respective counts and percentages in different female groups based on the different age brackets. \*  $p<0.05$  between cases and control for the age bracket.

|                                         | CASE GROUP        |                    |                    |                    |                    |                    |                     |                     |                     |                     | CONTROL GROUP       |                     |                     |                     |                     |                     |                     |                     |                     |                     |
|-----------------------------------------|-------------------|--------------------|--------------------|--------------------|--------------------|--------------------|---------------------|---------------------|---------------------|---------------------|---------------------|---------------------|---------------------|---------------------|---------------------|---------------------|---------------------|---------------------|---------------------|---------------------|
|                                         | ≤40               | ≤45                | ≤50                | ≤55                | ≤60                | ≤65                | ≤70                 | ≤75                 | <80                 | ALL                 | ≤40                 | ≤45                 | ≤50                 | ≤55                 | ≤60                 | ≤65                 | ≤70                 | ≤75                 | <80                 | ALL                 |
| N                                       | 88                | 155                | 269                | 433                | 710                | 1013               | 1396                | 1856                | 2369                | 3663                | 1988                | 2577                | 3325                | 4204                | 5211                | 6206                | 7350                | 8645                | 9938                | 14670               |
| Arteriopathies, N (%)                   | 15<br>(17)<br>*   | 28<br>(18.1)<br>*  | 43<br>(16)<br>*    | 73<br>(16.9)<br>*  | 102<br>(14.4)<br>* | 146<br>(14.4)<br>* | 191<br>(13.7)<br>*  | 258<br>(13.9)<br>*  | 352<br>(14.9)<br>*  | 545<br>(14.9)<br>*  | 11<br>(0.6)<br>*    | 18<br>(0.7)<br>*    | 22<br>(0.7)<br>*    | 36<br>(0.9)<br>*    | 43<br>(0.8)<br>*    | 57<br>(0.9)<br>*    | 78<br>(1.1)<br>*    | 99<br>(1.1)<br>*    | 115<br>(1.2)<br>*   | 188<br>(1.3)<br>*   |
| Chronic Systemic Disorder, N (%)        | 22<br>(25.0)<br>* | 36<br>(23.2)<br>*  | 73<br>(27.1)<br>*  | 127<br>(29.3)<br>* | 230<br>(32.4)<br>* | 323<br>(31.9)<br>* | 461<br>(33.0)<br>*  | 616<br>(33.2)<br>*  | 804<br>(33.9)<br>*  | 1332<br>(36.4)<br>* | 287<br>(14.4)<br>*  | 411<br>(15.9)<br>*  | 594<br>(17.9)<br>*  | 834<br>(19.8)<br>*  | 1121<br>(21.5)<br>* | 1426<br>(23.0)<br>* | 1790<br>(24.4)<br>* | 2178<br>(25.2)<br>* | 2513<br>(25.3)<br>* | 3534<br>(24.1)<br>* |
| Hypercoagulable State, N (%)            | 11<br>(12.5)<br>* | 17<br>(11.0)<br>*  | 24<br>(8.9)<br>*   | 31<br>(7.2)<br>*   | 41<br>(5.8)<br>*   | 51<br>(4.1)<br>*   | 57<br>(4.1)<br>*    | 63<br>(3.4)<br>*    | 65<br>(2.7)<br>*    | 79<br>(2.2)<br>*    | 22<br>(1.1)<br>*    | 33<br>(1.3)<br>*    | 46<br>(1.4)<br>*    | 59<br>(1.4)<br>*    | 71<br>(1.4)<br>*    | 82<br>(1.3)<br>*    | 102<br>(1.4)<br>*   | 116<br>(1.3)<br>*   | 123<br>(1.2)<br>*   | 150<br>(1.0)<br>*   |
| Atrial Fibrillation or Flutter, N (%)   | 3<br>(3.4)<br>*   | 6<br>(3.9)<br>*    | 8<br>(3.0)<br>*    | 14<br>(3.2)<br>*   | 35<br>(4.9)<br>*   | 77<br>(7.6)<br>*   | 151<br>(10.8)<br>*  | 249<br>(13.4)<br>*  | 382<br>(16.1)<br>*  | 881<br>(24.1)<br>*  | 16<br>(0.8)<br>*    | 20<br>(0.8)<br>*    | 41<br>(1.2)<br>*    | 66<br>(1.6)<br>*    | 126<br>(2.4)<br>*   | 223<br>(3.6)<br>*   | 377<br>(5.1)<br>*   | 646<br>(7.5)<br>*   | 993<br>(10.0)<br>*  | 2499<br>(17.0)<br>* |
| Alcohol Dependence or Abuse, N (%)      | 1<br>(1.1)<br>*   | 2<br>(1.3)<br>*    | 6<br>(2.2)<br>*    | 17<br>(3.9)<br>*   | 30<br>(4.2)<br>*   | 41<br>(4.0)<br>*   | 55<br>(3.9)<br>*    | 60<br>(3.2)<br>*    | 71<br>(3.0)<br>*    | 80<br>(2.2)<br>*    | 56<br>(2.8)<br>*    | 93<br>(3.6)<br>*    | 138<br>(4.2)<br>*   | 193<br>(4.6)<br>*   | 237<br>(4.5)<br>*   | 267<br>(4.3)<br>*   | 279<br>(3.8)<br>*   | 295<br>(3.4)<br>*   | 305<br>(3.1)<br>*   | 313<br>(2.1)<br>*   |
| Congestive Heart Failure, N (%)         | 4<br>(4.5)<br>*   | 5<br>(3.2)<br>*    | 9<br>(3.3)<br>*    | 14<br>(3.2)<br>*   | 40<br>(5.6)<br>*   | 69<br>(6.8)<br>*   | 110<br>(7.9)<br>*   | 169<br>(9.1)<br>*   | 227<br>(9.6)<br>*   | 495<br>(13.5)<br>*  | 10<br>(0.5)<br>*    | 26<br>(1.0)<br>*    | 49<br>(1.5)<br>*    | 110<br>(2.6)<br>*   | 197<br>(3.8)<br>*   | 315<br>(5.1)<br>*   | 466<br>(6.3)<br>*   | 695<br>(8.0)<br>*   | 925<br>(9.3)<br>*   | 1909<br>(13.0)<br>* |
| Diabetes Mellitus, N (%)                | 10<br>(11.4)<br>* | 21<br>(13.5)<br>*  | 49<br>(18.2)<br>*  | 97<br>(22.4)<br>*  | 189<br>(26.6)<br>* | 308<br>(30.4)<br>* | 451<br>(32.3)<br>*  | 626<br>(33.7)<br>*  | 790<br>(33.3)<br>*  | 1128<br>(30.8)<br>* | 113<br>(5.7)<br>*   | 185<br>(7.2)<br>*   | 277<br>(8.3)<br>*   | 425<br>(10.1)<br>*  | 655<br>(12.6)<br>*  | 908<br>(14.6)<br>*  | 1221<br>(16.6)<br>* | 1599<br>(18.5)<br>* | 1974<br>(19.9)<br>* | 3006<br>(20.5)<br>* |
| Drug Dependence or Abuse, N (%)         | 9<br>(10.2)<br>*  | 13<br>(8.4)<br>*   | 18<br>(6.7)<br>*   | 23<br>(5.3)<br>*   | 32<br>(4.5)<br>*   | 33<br>(3.3)<br>*   | 40<br>(2.9)<br>*    | 43<br>(2.3)<br>*    | 49<br>(2.1)<br>*    | 51<br>(1.4)<br>*    | 84<br>(4.2)<br>*    | 116<br>(4.5)<br>*   | 145<br>(4.4)<br>*   | 168<br>(4.0)<br>*   | 194<br>(3.7)<br>*   | 210<br>(3.4)<br>*   | 221<br>(3.0)<br>*   | 224<br>(2.6)<br>*   | 227<br>(2.3)<br>*   | 231<br>(1.6)<br>*   |
| Family History of Stroke or MI, N (%)   | 29<br>(33.0)<br>* | 53<br>(34.2)<br>*  | 107<br>(39.8)<br>* | 181<br>(41.8)<br>* | 303<br>(42.7)<br>* | 461<br>(45.5)<br>* | 647<br>(46.3)<br>*  | 845<br>(45.5)<br>*  | 1082<br>(45.7)<br>* | 1573<br>(42.9)<br>* | 382<br>(19.2)<br>*  | 554<br>(21.5)<br>*  | 805<br>(24.2)<br>*  | 1158<br>(27.5)<br>* | 1566<br>(30.1)<br>* | 1982<br>(31.9)<br>* | 2461<br>(33.5)<br>* | 2992<br>(34.6)<br>* | 3505<br>(35.3)<br>* | 4975<br>(33.9)<br>* |
| History of Myocardial Infarction, N (%) | 5<br>(5.7)<br>*   | 6<br>(3.9)<br>*    | 9<br>(3.3)<br>*    | 21<br>(4.8)<br>*   | 44<br>(6.2)<br>*   | 67<br>(6.6)<br>*   | 101<br>(7.2)<br>*   | 138<br>(7.4)<br>*   | 179<br>(7.6)<br>*   | 311<br>(8.5)<br>*   | 7<br>(0.4)<br>*     | 13<br>(0.5)<br>*    | 27<br>(0.8)<br>*    | 50<br>(1.2)<br>*    | 82<br>(1.6)<br>*    | 121<br>(1.9)<br>*   | 183<br>(2.5)<br>*   | 275<br>(3.2)<br>*   | 343<br>(3.5)<br>*   | 634<br>(4.3)<br>*   |
| Peripheral Vascular Disease, N (%)      | 0<br>(0.0)<br>*   | 3<br>(1.9)<br>*    | 9<br>(3.3)<br>*    | 25<br>(5.8)<br>*   | 64<br>(9.0)<br>*   | 100<br>(9.9)<br>*  | 150<br>(10.7)<br>*  | 214<br>(11.5)<br>*  | 282<br>(11.9)<br>*  | 490<br>(13.4)<br>*  | 4<br>(0.2)<br>*     | 7<br>(0.3)<br>*     | 20<br>(0.6)<br>*    | 36<br>(0.9)<br>*    | 66<br>(1.3)<br>*    | 86<br>(1.4)<br>*    | 130<br>(1.8)<br>*   | 200<br>(2.3)<br>*   | 264<br>(2.7)<br>*   | 526<br>(3.6)<br>*   |
| Patent Foramen Ovale, N (%)             | 24<br>(27.3)<br>* | 39<br>(25.2)<br>*  | 62<br>(23.0)<br>*  | 88<br>(20.3)<br>*  | 116<br>(16.3)<br>* | 148<br>(14.6)<br>* | 175<br>(12.5)<br>*  | 199<br>(10.7)<br>*  | 223<br>(9.4)<br>*   | 258<br>(7.0)<br>*   | 14<br>(0.7)<br>*    | 20<br>(0.8)<br>*    | 26<br>(0.8)<br>*    | 30<br>(0.7)<br>*    | 39<br>(0.7)<br>*    | 48<br>(0.8)<br>*    | 64<br>(0.9)<br>*    | 73<br>(0.8)<br>*    | 86<br>(0.9)<br>*    | 102<br>(0.7)<br>*   |
| Current Smoking, N (%)                  | 23<br>(26.1)<br>* | 46<br>(29.7)<br>*  | 79<br>(29.4)<br>*  | 127<br>(29.3)<br>* | 206<br>(29.0)<br>* | 273<br>(26.9)<br>* | 350<br>(25.1)<br>*  | 395<br>(21.3)<br>*  | 428<br>(18.1)<br>*  | 453<br>(12.4)<br>*  | 596<br>(30.0)<br>*  | 785<br>(30.5)<br>*  | 1025<br>(30.8)<br>* | 1275<br>(30.3)<br>* | 1537<br>(29.5)<br>* | 1714<br>(27.6)<br>* | 1860<br>(25.3)<br>* | 1970<br>(22.8)<br>* | 2055<br>(20.7)<br>* | 2145<br>(14.6)<br>* |
| Body Mass Index Elevated (>25) , N (%)  | 69<br>(78.4)<br>* | 121<br>(78.1)<br>* | 214<br>(79.6)<br>* | 340<br>(78.5)<br>* | 547<br>(77.0)<br>* | 785<br>(77.5)<br>* | 1082<br>(77.5)<br>* | 1433<br>(77.2)<br>* | 1801<br>(76.0)<br>* | 2508<br>(68.5)<br>* | 1139<br>(57.3)<br>* | 1531<br>(59.4)<br>* | 2017<br>(60.7)<br>* | 2603<br>(61.9)<br>* | 3304<br>(64.4)<br>* | 4022<br>(64.8)<br>* | 4828<br>(65.7)<br>* | 5733<br>(66.3)<br>* | 6593<br>(66.3)<br>* | 8983<br>(61.2)<br>* |
| Arterial Dissection, N (%)              | 2<br>(2.3)<br>*   | 3<br>(1.9)<br>*    | 5<br>(1.9)<br>*    | 5<br>(1.2)<br>*    | 5<br>(0.7)<br>*    | 5<br>(0.5)<br>*    | 6<br>(0.4)<br>*     | 6<br>(0.3)<br>*     | 7<br>(0.3)<br>*     | 9<br>(0.2)<br>*     | 1<br>(0.1)<br>*     | 2<br>(0.1)<br>*     | 2<br>(0.1)<br>*     | 2<br>(0.0)<br>*     |
| Neoplasm, N (%)                         | 1<br>(1.1)<br>*   | 5<br>(3.2)<br>*    | 11<br>(4.1)<br>*   | 22<br>(5.1)<br>*   | 50<br>(7.0)<br>*   | 77<br>(7.6)<br>*   | 135<br>(9.7)<br>*   | 207<br>(11.2)<br>*  | 285<br>(12.0)<br>*  | 533<br>(14.6)<br>*  | 37<br>(1.9)<br>*    | 67<br>(2.6)<br>*    | 127<br>(3.8)<br>*   | 218<br>(5.2)<br>*   | 360<br>(6.9)<br>*   | 526<br>(8.5)<br>*   | 735<br>(10.0)<br>*  | 971<br>(11.2)<br>*  | 1208<br>(12.2)<br>* | 1957<br>(13.3)<br>* |
| Rheumatic Disease, N (%)                | 3<br>(3.4)<br>*   | 8<br>(5.2)<br>*    | 11<br>(4.1)<br>*   | 20<br>(4.6)<br>*   | 38<br>(5.4)<br>*   | 61<br>(6.0)<br>*   | 96<br>(6.9)<br>*    | 127<br>(6.8)<br>*   | 174<br>(7.3)<br>*   | 263<br>(7.2)<br>*   | 53<br>(2.7)<br>*    | 80<br>(3.1)<br>*    | 123<br>(3.7)<br>*   | 175<br>(4.2)<br>*   | 238<br>(4.6)<br>*   | 326<br>(5.3)<br>*   | 408<br>(5.6)<br>*   | 529<br>(6.1)<br>*   | 643<br>(6.5)<br>*   | 1027<br>(7.0)<br>*  |

|                                      |                   |                   |                    |                    |                    |                    |                    |                     |                     |                     |                    |                    |                    |                     |                     |                     |                     |                     |                     |                     |
|--------------------------------------|-------------------|-------------------|--------------------|--------------------|--------------------|--------------------|--------------------|---------------------|---------------------|---------------------|--------------------|--------------------|--------------------|---------------------|---------------------|---------------------|---------------------|---------------------|---------------------|---------------------|
| Migraines, N (%)                     | 26<br>(29.5)<br>* | 44<br>(28.5)<br>* | 68<br>(25.3)<br>*  | 93<br>(21.5)<br>*  | 122<br>(17.2)<br>* | 142<br>(14.0)<br>* | 163<br>(11.7)<br>* | 184<br>(9.9)<br>*   | 205<br>(9.7)<br>*   | 239<br>(6.5)<br>*   | 193<br>(9.7)<br>*  | 273<br>(10.6)<br>* | 368<br>(11.1)<br>* | 464<br>(11.0)<br>*  | 523<br>(10.0)<br>*  | 588<br>(9.5)<br>*   | 638<br>(8.7)<br>*   | 674<br>(7.8)<br>*   | 696<br>(7.0)<br>*   | 740<br>(5.0)<br>*   |
| Hypertension, N (%)                  | 24<br>(7.3)<br>*  | 49<br>(31.6)<br>* | 116<br>(43.1)<br>* | 227<br>(52.4)<br>* | 419<br>(59.0)<br>* | 649<br>(64.1)<br>* | 966<br>(69.2)<br>* | 1338<br>(72.1)<br>* | 1764<br>(74.5)<br>* | 2862<br>(78.1)<br>* | 269<br>(13.6)<br>* | 436<br>(16.9)<br>* | 721<br>(21.7)<br>* | 1142<br>(27.2)<br>* | 1699<br>(32.6)<br>* | 2333<br>(37.6)<br>* | 3154<br>(42.9)<br>* | 4145<br>(47.9)<br>* | 5168<br>(52.0)<br>* | 9035<br>(61.6)<br>* |
| Dyslipidemia, N (%)                  | 12<br>(13.6)<br>* | 27<br>(17.4)<br>* | 79<br>(29.4)<br>*  | 163<br>(37.6)<br>* | 312<br>(43.9)<br>* | 497<br>(49.1)<br>* | 755<br>(54.1)<br>* | 1058<br>(57.0)<br>* | 1390<br>(58.7)<br>* | 2206<br>(60.2)<br>* | 100<br>(5.0)<br>*  | 197<br>(7.6)<br>*  | 365<br>(11.0)<br>* | 607<br>(14.4)<br>*  | 950<br>(18.2)<br>*  | 1342<br>(21.6)<br>* | 1853<br>(25.2)<br>* | 2484<br>(28.7)<br>* | 3117<br>(31.4)<br>* | 5190<br>(35.4)<br>* |
| Mood Disorder, N (%)                 | 21<br>(23.9)<br>* | 31<br>(20.0)<br>* | 68<br>(25.3)<br>*  | 122<br>(28.2)<br>* | 201<br>(28.3)<br>* | 275<br>(27.1)<br>* | 371<br>(26.6)<br>* | 464<br>(25.0)<br>*  | 549<br>(23.2)<br>*  | 766<br>(20.9)<br>*  | 389<br>(19.6)<br>* | 551<br>(21.4)<br>* | 780<br>(23.5)<br>* | 1038<br>(24.7)<br>* | 1314<br>(25.2)<br>* | 1588<br>(25.6)<br>* | 1841<br>(25.0)<br>* | 2079<br>(24.0)<br>* | 2284<br>(23.0)<br>* | 2785<br>(19.0)<br>* |
| Anxiety Disorder, N (%)              | 24<br>(27.3)<br>* | 39<br>(25.2)<br>* | 65<br>(25.2)<br>*  | 106<br>(24.5)<br>* | 167<br>(23.5)<br>* | 219<br>(21.6)<br>* | 295<br>(21.1)<br>* | 375<br>(20.2)<br>*  | 481<br>(20.3)<br>*  | 720<br>(19.7)<br>*  | 289<br>(14.5)<br>* | 414<br>(16.1)<br>* | 570<br>(17.1)<br>* | 762<br>(18.1)<br>*  | 977<br>(18.7)<br>*  | 1165<br>(18.8)<br>* | 1388<br>(18.9)<br>* | 1620<br>(18.7)<br>* | 1815<br>(18.3)<br>* | 2401<br>(16.4)<br>* |
| Giant Cell Temporal Arteritis, N (%) | 0<br>(0.0)<br>*   | 0<br>(0.0)<br>*   | 0<br>(0.0)<br>*    | 0<br>(0.0)<br>*    | 0<br>(0.0)<br>*    | 0<br>(0.0)<br>*    | 0<br>(0.0)<br>*    | 1<br>(0.1)<br>*     | 2<br>(0.1)<br>*     | 10<br>(0.03)<br>*   | 0<br>(0.0)<br>*    | 0<br>(0.0)<br>*    | 0<br>(0.0)<br>*    | 1<br>(0.1)<br>*     | 3<br>(0.1)<br>*     | 5<br>(0.1)<br>*     | 10<br>(0.1)<br>*    | 18<br>(0.2)<br>*    | 25<br>(0.3)<br>*    | 63<br>(0.4)<br>*    |

**Table S5.** List of variables and the respective counts and percentages in different male groups based on the different age brackets. \*  $p < 0.05$  between cases and control for the age bracket.

| N                                       | CASE GROUP        |                    |                    |                    |                    |                    |                    |                     |                     |                     | CONTROL GROUP      |                    |                    |                     |                     |                     |                     |                     |                     |                     |
|-----------------------------------------|-------------------|--------------------|--------------------|--------------------|--------------------|--------------------|--------------------|---------------------|---------------------|---------------------|--------------------|--------------------|--------------------|---------------------|---------------------|---------------------|---------------------|---------------------|---------------------|---------------------|
|                                         | ≤40               | ≤45                | ≤50                | ≤55                | ≤60                | ≤65                | ≤70                | ≤75                 | <80                 | ALL                 | ≤40                | ≤45                | ≤50                | ≤55                 | ≤60                 | ≤65                 | ≤70                 | ≤75                 | <80                 | ALL                 |
| Arteriopathies, N (%)                   | 80<br>(11.2)<br>* | 179<br>(11.2)<br>* | 348<br>(8.9)<br>*  | 613<br>(10.0)<br>* | 1052<br>(9.8)<br>* | 1534<br>(9.7)<br>* | 2084<br>(9.7)<br>* | 2582<br>(10.2)<br>* | 3066<br>(10.6)<br>* | 3892<br>(11.4)<br>* | 3572<br>(0.2)<br>* | 4410<br>(0.2)<br>* | 5506<br>(0.3)<br>* | 6867<br>(0.3)<br>*  | 8272<br>(0.3)<br>*  | 9612<br>(0.3)<br>*  | 11023<br>(0.4)<br>* | 12330<br>(0.4)<br>* | 13578<br>(0.5)<br>* | 16397<br>(0.5)<br>* |
| Chronic Systemic Disorder, N (%)        | 20<br>(25.0)<br>* | 35<br>(19.6)<br>*  | 68<br>(19.5)<br>*  | 118<br>(19.2)<br>* | 240<br>(22.8)<br>* | 384<br>(25.0)<br>* | 543<br>(26.1)<br>* | 706<br>(27.3)<br>*  | 910<br>(29.7)<br>*  | 1280<br>(32.9)<br>* | 255<br>(7.1)<br>*  | 327<br>(7.4)<br>*  | 477<br>(8.7)<br>*  | 762<br>(11.1)<br>*  | 1070<br>(12.9)<br>* | 1388<br>(14.4)<br>* | 1805<br>(16.4)<br>* | 2180<br>(17.7)<br>* | 2560<br>(18.9)<br>* | 3367<br>(20.5)<br>* |
| Hypercoagulable State, N (%)            | 6<br>(7.5)<br>*   | 11<br>(6.1)<br>*   | 24<br>(6.9)<br>*   | 26<br>(4.2)<br>*   | 38<br>(3.6)<br>*   | 48<br>(3.1)<br>*   | 57<br>(2.7)<br>*   | 63<br>(2.4)<br>*    | 66<br>(2.2)<br>*    | 70<br>(1.8)<br>*    | 10<br>(0.3)<br>*   | 14<br>(0.3)<br>*   | 25<br>(0.5)<br>*   | 36<br>(0.5)<br>*    | 52<br>(0.6)<br>*    | 62<br>(0.6)<br>*    | 78<br>(0.7)<br>*    | 85<br>(0.7)<br>*    | 97<br>(0.7)<br>*    | 114<br>(0.7)<br>*   |
| Atrial Fibrillation or Flutter, N (%)   | 1<br>(1.2)<br>*   | 3<br>(1.7)<br>*    | 12<br>(3.4)<br>*   | 33<br>(5.4)<br>*   | 82<br>(7.8)<br>*   | 144<br>(9.4)<br>*  | 250<br>(12.0)<br>* | 381<br>(14.8)<br>*  | 537<br>(17.5)<br>*  | 840<br>(21.6)<br>*  | 35<br>(1.0)<br>*   | 58<br>(1.3)<br>*   | 100<br>(1.8)<br>*  | 172<br>(2.5)<br>*   | 288<br>(3.5)<br>*   | 445<br>(4.6)<br>*   | 724<br>(6.6)<br>*   | 1062<br>(8.6)<br>*  | 1453<br>(10.7)<br>* | 2566<br>(15.6)<br>* |
| Alcohol Dependence or Abuse, N (%)      | 4<br>(5.0)<br>*   | 16<br>(8.9)<br>*   | 38<br>(10.9)<br>*  | 70<br>(11.4)<br>*  | 112<br>(10.6)<br>* | 156<br>(10.2)<br>* | 197<br>(9.5)<br>*  | 229<br>(8.9)<br>*   | 246<br>(8.0)<br>*   | 261<br>(6.7)<br>*   | 106<br>(3.0)<br>*  | 160<br>(3.6)<br>*  | 250<br>(4.5)<br>*  | 377<br>(5.5)<br>*   | 508<br>(6.1)<br>*   | 595<br>(6.2)<br>*   | 656<br>(6.0)<br>*   | 708<br>(5.7)<br>*   | 736<br>(5.4)<br>*   | 771<br>(4.7)<br>*   |
| Congestive Heart Failure, N (%)         | 4<br>(5.0)<br>*   | 7<br>(3.9)<br>*    | 18<br>(5.2)<br>*   | 33<br>(5.4)<br>*   | 67<br>(6.4)<br>*   | 107<br>(7.0)<br>*  | 164<br>(7.9)<br>*  | 216<br>(8.4)<br>*   | 284<br>(9.3)<br>*   | 452<br>(11.6)<br>*  | 25<br>(0.7)<br>*   | 43<br>(1.0)<br>*   | 86<br>(1.6)<br>*   | 157<br>(2.3)<br>*   | 240<br>(2.9)<br>*   | 382<br>(4.0)<br>*   | 600<br>(5.4)<br>*   | 845<br>(6.9)<br>*   | 1132<br>(8.3)<br>*  | 1841<br>(11.2)<br>* |
| Diabetes Mellitus, N (%)                | 14<br>(17.5)<br>* | 35<br>(19.6)<br>*  | 78<br>(22.4)<br>*  | 159<br>(25.9)<br>* | 291<br>(27.7)<br>* | 439<br>(28.6)<br>* | 653<br>(31.3)<br>* | 825<br>(32.0)<br>*  | 996<br>(32.5)<br>*  | 1254<br>(32.2)<br>* | 82<br>(2.3)<br>*   | 143<br>(3.2)<br>*  | 258<br>(4.8)<br>*  | 464<br>(6.8)<br>*   | 725<br>(8.8)<br>*   | 1037<br>(10.8)<br>* | 1443<br>(13.1)<br>* | 1857<br>(15.1)<br>* | 2248<br>(16.6)<br>* | 3017<br>(18.4)<br>* |
| Drug Dependence or Abuse, N (%)         | 6<br>(7.5)<br>*   | 11<br>(6.1)<br>*   | 20<br>(5.7)<br>*   | 25<br>(4.1)<br>*   | 39<br>(3.7)<br>*   | 45<br>(2.9)<br>*   | 52<br>(2.5)<br>*   | 57<br>(2.2)<br>*    | 58<br>(1.9)<br>*    | 58<br>(1.5)<br>*    | 116<br>(3.2)<br>*  | 142<br>(3.2)<br>*  | 170<br>(3.1)<br>*  | 198<br>(2.9)<br>*   | 229<br>(2.8)<br>*   | 252<br>(2.6)<br>*   | 264<br>(2.4)<br>*   | 269<br>(2.2)<br>*   | 272<br>(2.0)<br>*   | 273<br>(1.7)<br>*   |
| Family History of Stroke or MI, N (%)   | 21<br>(26.2)<br>* | 50<br>(27.9)<br>*  | 111<br>(31.9)<br>* | 232<br>(37.8)<br>* | 401<br>(38.1)<br>* | 595<br>(38.8)<br>* | 847<br>(40.6)<br>* | 1063<br>(41.2)<br>* | 1263<br>(41.2)<br>* | 1543<br>(39.6)<br>* | 300<br>(8.4)<br>*  | 476<br>(10.8)<br>* | 735<br>(13.3)<br>* | 1118<br>(16.3)<br>* | 1528<br>(18.5)<br>* | 1945<br>(20.2)<br>* | 2424<br>(22.0)<br>* | 2867<br>(23.3)<br>* | 3300<br>(24.3)<br>* | 4097<br>(25.0)<br>* |
| History of Myocardial Infarction, N (%) | 3<br>(3.8)<br>*   | 9<br>(5.0)<br>*    | 22<br>(6.3)<br>*   | 48<br>(7.8)<br>*   | 92<br>(8.7)<br>*   | 138<br>(9.0)<br>*  | 220<br>(10.6)<br>* | 284<br>(11.0)<br>*  | 362<br>(11.8)<br>*  | 498<br>(12.8)<br>*  | 11<br>(0.3)<br>*   | 24<br>(0.5)<br>*   | 54<br>(1.0)<br>*   | 100<br>(1.5)<br>*   | 144<br>(1.7)<br>*   | 226<br>(2.4)<br>*   | 337<br>(3.1)<br>*   | 449<br>(3.6)<br>*   | 573<br>(4.2)<br>*   | 794<br>(4.8)<br>*   |
| Peripheral Vascular Disease, N (%)      | 1<br>(1.2)<br>*   | 7<br>(3.9)<br>*    | 23<br>(6.6)<br>*   | 40<br>(6.5)<br>*   | 101<br>(9.6)<br>*  | 163<br>(10.6)<br>* | 265<br>(12.7)<br>* | 360<br>(13.9)<br>*  | 474<br>(15.5)<br>*  | 655<br>(16.8)<br>*  | 0<br>(0.0)<br>*    | 3<br>(0.1)<br>*    | 8<br>(0.1)<br>*    | 35<br>(0.5)<br>*    | 56<br>(0.7)<br>*    | 117<br>(1.2)<br>*   | 195<br>(1.8)<br>*   | 291<br>(2.4)<br>*   | 407<br>(3.0)<br>*   | 637<br>(3.9)<br>*   |

|                                          | *                 | *                  | *                  | *                  | *                  | *                   | *                   | *                   | *                   | *                   |  | *                   | *                   | *                   | *                   | *                   | *                   | *                   | *                   | *                   |                      |
|------------------------------------------|-------------------|--------------------|--------------------|--------------------|--------------------|---------------------|---------------------|---------------------|---------------------|---------------------|--|---------------------|---------------------|---------------------|---------------------|---------------------|---------------------|---------------------|---------------------|---------------------|----------------------|
| Patent Foramen Ovale, N (%)              | 22<br>(27.5)<br>* | 40<br>(22.3)<br>*  | 67<br>(19.3)<br>*  | 103<br>(16.8)<br>* | 154<br>(14.6)<br>* | 193<br>(12.6)<br>*  | 235<br>(11.3)<br>*  | 267<br>(10.3)<br>*  | 300<br>(9.8)<br>*   | 328<br>(8.4)<br>*   |  | 10<br>(0.3)<br>*    | 12<br>(0.3)<br>*    | 19<br>(0.3)<br>*    | 25<br>(0.4)<br>*    | 33<br>(0.4)<br>*    | 47<br>(0.5)<br>*    | 55<br>(0.5)<br>*    | 60<br>(0.5)<br>*    | 64<br>(0.5)<br>*    | 78<br>(0.5)<br>*     |
| Current Smoking, N (%)                   | 18<br>(22.5)      | 41<br>(22.9)       | 84<br>(24.1)       | 159<br>(25.9)      | 276<br>(26.2)      | 380<br>(24.8)       | 480<br>(23.0)       | 543<br>(21.0)       | 585<br>(19.1)       | 629<br>(16.2)       |  | 809<br>(22.6)       | 1015<br>(23.0)      | 1292<br>(23.5)      | 1658<br>(24.1)      | 2006<br>(24.3)      | 2281<br>(23.7)      | 2470<br>(22.4)      | 2631<br>(21.3)      | 2740<br>(20.2)      | 2829<br>(17.3)       |
| Body Mass Index Elevated<br>(>25), N (%) | 63<br>(78.8)<br>* | 144<br>(80.4)<br>* | 278<br>(79.9)<br>* | 497<br>(81.1)<br>* | 836<br>(79.5)<br>* | 1219<br>(79.5)<br>* | 1661<br>(79.7)<br>* | 2055<br>(79.6)<br>* | 2420<br>(78.9)<br>* | 2956<br>(76.0)<br>* |  | 2064<br>(57.8)<br>* | 2667<br>(60.5)<br>* | 3447<br>(62.6)<br>* | 4473<br>(65.1)<br>* | 5484<br>(66.3)<br>* | 6431<br>(66.9)<br>* | 7447<br>(67.6)<br>* | 8364<br>(67.8)<br>* | 9217<br>(67.9)<br>* | 10720<br>(65.4)<br>* |
| Arterial Dissection, N (%)               | 1<br>(1.2)<br>*   | 3<br>(1.7)<br>*    | 3<br>(0.9)<br>*    | 5<br>(0.8)<br>*    | 8<br>(0.8)<br>*    | 8<br>(0.5)<br>*     | 9<br>(0.4)<br>*     | 10<br>(0.4)<br>*    | 10<br>(0.3)<br>*    | 11<br>(0.3)<br>*    |  | 5<br>(0.1)<br>*     | 6<br>(0.1)<br>*     | 6<br>(0.1)<br>*     | 6<br>(0.1)<br>*     | 6<br>(0.1)<br>*     | 7<br>(0.1)<br>*     | 7<br>(0.1)<br>*     | 8<br>(0.1)<br>*     | 8<br>(0.1)<br>*     | 9<br>(0.1)<br>*      |
| Neoplasm, N (%)                          | 3<br>(3.8)        | 6<br>(3.4)         | 10<br>(2.9)        | 19<br>(3.1)        | 59<br>(5.6)<br>*   | 98<br>(6.4)         | 170<br>(8.2)        | 272<br>(10.5)<br>*  | 371<br>(12.1)<br>*  | 617<br>(15.9)<br>*  |  | 34<br>(1.0)         | 60<br>(1.4)         | 113<br>(2.1)        | 194<br>(2.8)        | 325<br>(3.9)<br>*   | 518<br>(5.4)        | 764<br>(6.9)        | 1004<br>(8.1)<br>*  | 1298<br>(9.6)<br>*  | 2050<br>(12.5)<br>*  |
| Rheumatic Disease, N (%)                 | 0<br>(0.0)        | 2<br>(1.1)         | 4<br>(1.1)         | 9<br>(1.5)<br>*    | 18<br>(1.7)<br>*   | 25<br>(1.6)         | 35<br>(1.7)         | 49<br>(1.9)         | 61<br>(2.0)         | 94<br>(2.4)         |  | 16<br>(0.4)         | 18<br>(0.4)         | 29<br>(0.5)         | 44<br>(0.6)<br>*    | 77<br>(0.9)<br>*    | 111<br>(1.2)        | 147<br>(1.3)        | 196<br>(1.5)        | 239<br>(1.8)        | 352<br>(2.1)         |
| Migraines, N (%)                         | 4<br>(5.0)        | 13<br>(7.3)<br>*   | 24<br>(6.9)<br>*   | 36<br>(5.9)<br>*   | 53<br>(5.0)<br>*   | 64<br>(4.2)<br>*    | 82<br>(3.9)<br>*    | 87<br>(3.4)<br>*    | 94<br>(3.1)<br>*    | 102<br>(2.6)<br>*   |  | 68<br>(0.4)         | 88<br>(2.0)<br>*    | 114<br>(2.1)<br>*   | 137<br>(2.0)<br>*   | 164<br>(2.0)<br>*   | 188<br>(2.0)<br>*   | 198<br>(1.8)<br>*   | 211<br>(1.7)<br>*   | 220<br>(1.6)<br>*   | 225<br>(1.4)<br>*    |
| Hypertension, N (%)                      | 37<br>(46.2)<br>* | 93<br>(52.0)<br>*  | 208<br>(59.8)<br>* | 405<br>(66.1)<br>* | 755<br>(71.8)<br>* | 1120<br>(73.0)<br>* | 1571<br>(75.4)<br>* | 1991<br>(77.1)<br>* | 2405<br>(78.4)<br>* | 3082<br>(79.2)<br>* |  | 367<br>(10.3)<br>*  | 644<br>(14.6)<br>*  | 1071<br>(19.5)<br>* | 1743<br>(24.4)<br>* | 2524<br>(30.5)<br>* | 3376<br>(35.1)<br>* | 4371<br>(39.7)<br>* | 5328<br>(43.2)<br>* | 6262<br>(46.1)<br>* | 8440<br>(51.5)<br>*  |
| Dyslipidemia, N (%)                      | 26<br>(32.5)<br>* | 69<br>(38.5)<br>*  | 153<br>(44.0)<br>* | 304<br>(49.6)<br>* | 574<br>(54.6)<br>* | 869<br>(56.6)<br>*  | 1255<br>(60.2)<br>* | 1570<br>(60.8)<br>* | 1894<br>(61.8)<br>* | 2414<br>(62.0)<br>* |  | 97<br>(2.7)<br>*    | 199<br>(4.5)<br>*   | 394<br>(7.2)<br>*   | 717<br>(10.4)<br>*  | 1133<br>(13.7)<br>* | 1607<br>(16.7)<br>* | 2224<br>(20.2)<br>* | 2818<br>(22.9)<br>* | 2444<br>(25.4)<br>* | 4826<br>(29.4)<br>*  |
| Mood Disorder, N (%)                     | 12<br>(15.0)<br>* | 28<br>(15.6)<br>*  | 52<br>(14.9)<br>*  | 81<br>(13.2)<br>*  | 148<br>(14.1)<br>* | 223<br>(14.5)<br>*  | 299<br>(14.3)<br>*  | 355<br>(13.7)<br>*  | 427<br>(13.9)<br>*  | 510<br>(13.1)<br>*  |  | 256<br>(7.2)<br>*   | 353<br>(8.0)<br>*   | 491<br>(8.9)<br>*   | 675<br>(9.8)<br>*   | 883<br>(10.7)<br>*  | 1070<br>(11.1)<br>* | 1257<br>(11.4)<br>* | 1393<br>(11.3)<br>* | 1539<br>(11.3)<br>* | 1764<br>(10.8)<br>*  |
| Anxiety Disorder, N (%)                  | 8<br>(10.0)       | 22<br>(12.3)<br>*  | 44<br>(12.6)<br>*  | 68<br>(11.1)<br>*  | 121<br>(11.5)<br>* | 169<br>(11.0)<br>*  | 236<br>(11.3)<br>*  | 278<br>(10.8)<br>*  | 318<br>(10.4)<br>*  | 391<br>(10.0)<br>*  |  | 181<br>(5.1)        | 263<br>(6.0)<br>*   | 363<br>(6.6)<br>*   | 511<br>(7.4)<br>*   | 647<br>(7.8)<br>*   | 772<br>(8.0)<br>*   | 916<br>(8.3)<br>*   | 1036<br>(8.4)<br>*  | 1147<br>(8.4)<br>*  | 1319<br>(8.0)<br>*   |
| Giant Cell Temporal Arteritis,<br>N (%)  | 0<br>(0.0)        | 0<br>(0.0)         | 0<br>(0.0)         | 0<br>(0.0)         | 0<br>(0.0)         | 0<br>(0.0)          | 1<br>(0.0)          | 2<br>(0.1)          | 2<br>(0.1)          | 5<br>(0.1)          |  | 0<br>(0.0)          | 0<br>(0.0)          | 1<br>(0.0)          | 1<br>(0.0)          | 2<br>(0.0)          | 5<br>(0.1)          | 7<br>(0.1)          | 7<br>(0.1)          | 12<br>(0.1)         | 26<br>(0.2)          |

**Table S6.** The best model for each age bracket for males and females, as well as optimized model parameters.

| Age Group | Model (model parameters)                                                                                                                     |
|-----------|----------------------------------------------------------------------------------------------------------------------------------------------|
| Female    |                                                                                                                                              |
| ALL       | GLM                                                                                                                                          |
| <40       | GLM                                                                                                                                          |
| <45       | RF (mtry=6)                                                                                                                                  |
| <50       | GLM                                                                                                                                          |
| <55       | GLM                                                                                                                                          |
| <60       | GLM                                                                                                                                          |
| <65       | GLM                                                                                                                                          |
| <70       | GLM                                                                                                                                          |
| <75       | XGB (Max depth=8 eta=0.52; Rate drop=0.19; Skip drop=0.35; Min child weight=1; subsample=0.85; Colsamplebytree=0.60; gamma=6.76; nrounds=67) |
| Male      |                                                                                                                                              |
| ALL       | GLM                                                                                                                                          |
| <40       | GLM                                                                                                                                          |
| <45       | RF (mtry=3)                                                                                                                                  |
| <50       | GLM                                                                                                                                          |
| <55       | GLM                                                                                                                                          |
| <60       | GLM                                                                                                                                          |
| <65       | GLM                                                                                                                                          |
| <70       | GLM                                                                                                                                          |
| <75       | GLM                                                                                                                                          |



Table S7. Studies on young stroke patients with the respective findings and the age cut-point used.

Abbreviations include female (F), male (M), oral contraceptive pill (OCP), history (Hx), hypertension (HTN), odds ratio (OR), diabetes mellitus (DM), congestive heart failure (CHF), International Pediatric Stroke Study (IPSS) Criteria, Trial of Org 10172 in Acute Stroke Treatment (TOAST) Criteria, peripheral arterial disease (PAD), atrial fibrillation (AF), ischemic heart disease (IHD), risk factor (RF), genome wide association study (GWAS).

| Study                                     | Type                 | Age | Sample                                                                                                                                 | Findings                                                                                                                                                                                                                                                                                                                                                                                                                                                                                                                                                                                                                   |
|-------------------------------------------|----------------------|-----|----------------------------------------------------------------------------------------------------------------------------------------|----------------------------------------------------------------------------------------------------------------------------------------------------------------------------------------------------------------------------------------------------------------------------------------------------------------------------------------------------------------------------------------------------------------------------------------------------------------------------------------------------------------------------------------------------------------------------------------------------------------------------|
| (2019)                                    | Chart review         | 50  | 5257 first-ever stroke from Dutch Hospital Registry; 55.3% ischemic stroke                                                             | <ul style="list-style-type: none"> <li>Incidence of all types of “young stroke” increased from 1998 to 2010, driven by an increase in those aged over 35 years.</li> <li>F&gt;M in all age cohorts may be explained by higher rates of migraine, coagulopathy, OCPs and pregnancy in females.</li> </ul>                                                                                                                                                                                                                                                                                                                   |
| <a href="#">Di Giuli et al. (2017)</a>    | Cohort               | 45  | 2485 first-ever ischemic stroke with a Hx of migraine                                                                                  | <ul style="list-style-type: none"> <li>Migraine without aura independently associated with cervical dissection stroke etiology in young</li> </ul>                                                                                                                                                                                                                                                                                                                                                                                                                                                                         |
| <a href="#">Aigner et al. (2017)</a>      | Case Control         | 55  | 2125 first time strokes from the “Stroke in Young Fabry Patients” registry (2007-2010) vs. 8500 controls from “GEDA” study (2009-2010) | <ul style="list-style-type: none"> <li>Low physical activity and HTN were the most important factors in determining risk of stroke.</li> <li>HTN, low activity, hyperlipidemia, DM, CHF, smoking, binge drinking, and obesity together accounted for 78.9% of strokes in young.</li> </ul>                                                                                                                                                                                                                                                                                                                                 |
| <a href="#">Li et al. (2017)</a>          | Retrospective cohort | 45  | 1,395 first time ischemic stroke                                                                                                       | <ul style="list-style-type: none"> <li>Vascular disease, especially premature atherosclerosis, is the most significant risk factor for ischemic stroke in the young adult population of northern China</li> </ul>                                                                                                                                                                                                                                                                                                                                                                                                          |
| <a href="#">Cheng et al. (2016)</a>       | Case Control         | 49  | 1090 cases and 1154 controls                                                                                                           | <ul style="list-style-type: none"> <li>In adjusted analysis (controlling for alcohol, smoking and HTN) the OR for stroke secondary to acute cocaine use by any route was 5.7 (95%CI, 1.7-19.7) indicating a causal association between acute cocaine use and risk of young stroke.</li> </ul>                                                                                                                                                                                                                                                                                                                              |
| <a href="#">van Alebeek et al. (2017)</a> | Prospective cohort   | 50  | 656 Patients enrolled in FUTURE study who had ischemic or hemorrhagic stroke, or a TIA                                                 | <ul style="list-style-type: none"> <li>Stroke etiology classified according to IPSS and TOAST criteria - 226 patients had stroke of unknown etiology based on TOAST, but 188 of these were assigned an etiology based on IPSS criteria.</li> <li>IPSS criteria (for pediatric strokes) includes categories of arteriopathy, cardiac disorders, chronic systemic conditions, prothrombotic states, acute systemic conditions, chronic head and neck disorders, acute head and neck disorders, infection and risk factors for atherosclerosis in adulthood (+ added pregnancy / postpartum category for females).</li> </ul> |
| <a href="#">Rohr et al. (1996)</a>        | Case Control         | 44  | 296 cases of first-time ischemic stroke and 1220 controls                                                                              | <ul style="list-style-type: none"> <li>HTN, DM, and current smoking are the most important risk factors in young adults</li> </ul>                                                                                                                                                                                                                                                                                                                                                                                                                                                                                         |
| <a href="#">Ji et al. (2013)</a>          | Retrospective cohort | 45  | 150 ischemic stroke/TIA patients from the AHA “Get with The Guidelines” database                                                       | <ul style="list-style-type: none"> <li>47% had cardioembolic etiology</li> <li>Multiple infarcts (31%) occurred more in &lt;35-year-olds</li> <li>Young patient risk factor profile included 20% with HTN, 10% with DM, 38% with dyslipidemia, 34% smokers.</li> </ul>                                                                                                                                                                                                                                                                                                                                                     |

|                                          |                        |    |                                                                                                                                                                            |                                                                                                                                                                                                                                                                                                                                                                                                                      |
|------------------------------------------|------------------------|----|----------------------------------------------------------------------------------------------------------------------------------------------------------------------------|----------------------------------------------------------------------------------------------------------------------------------------------------------------------------------------------------------------------------------------------------------------------------------------------------------------------------------------------------------------------------------------------------------------------|
|                                          |                        |    |                                                                                                                                                                            | <ul style="list-style-type: none"> <li>Young adults have heterogeneous causes for stroke, but traditional vascular risk factors are very prevalent.</li> </ul>                                                                                                                                                                                                                                                       |
| <a href="#">Renna et al. (2014)</a>      | Prospective cohort     | 50 | 150 patients admitted with ischemic stroke.                                                                                                                                | <ul style="list-style-type: none"> <li>Etiologies classified by TOAST.</li> <li>53% had dyslipidemia, 47% had smoking, 39% had HTN, 33% had PFO, 30% had cardioembolic 11% had large vessel disease, 8% had small vessel disease, 44% had stroke of unknown etiology.</li> <li>Traditional risk factors are common among young adults with stroke.</li> </ul>                                                        |
| <a href="#">Kristensen et al. (1997)</a> | Retrospective cohort   | 44 | Part 1: 88 patients from MONICA cohort<br>Part 2: referred to university hospital with ischemic stroke (107 patients)                                                      | <ul style="list-style-type: none"> <li>Classified by modified TOAST criteria</li> <li>Spontaneous cervical arterial dissection was the leading probable etiology (13%).</li> <li>There was a higher than predicted incidence of stroke in young that was not explained by premature atherosclerosis.</li> </ul>                                                                                                      |
| <a href="#">Musolino et al. (2003)</a>   | Prospective cohort     | 45 | 60 patients with stroke (n=55) or TIA (n=5) followed up for 1 or more years for recurrence and post stroke disability.                                                     | <ul style="list-style-type: none"> <li>Atherothrombotic causes were more common &gt;35-year-olds</li> <li>Migraine was more common in females and smoking was more common in males</li> <li>61% had two or more RF present</li> </ul>                                                                                                                                                                                |
| Putala et al. (2012)                     | Cross-sectional cohort | 49 | First ever ischemic stroke patients from prospective or consecutive stroke registries in Europe.                                                                           | <ul style="list-style-type: none"> <li>The most common RF were smoking, HTN and dyslipidemia</li> <li>Males were older and more commonly had dyslipidemia, coronary heart disease and were smokers compared to females</li> <li>Fam Hx of stroke, PAD, AF, smoking, HTN, DM, IHD and dyslipidemia were positive correlated with age in both genders (i.e. became increasingly prevalent as patients aged)</li> </ul> |
| Bejot et al. (2013)                      | Prospective cohort     | 55 | First ever ischemic stroke patients from Dijon Registry                                                                                                                    | <ul style="list-style-type: none"> <li>Incidence of stroke in people under 55 increased over 1985-2011.</li> <li>Smoking was the most common RF in young patients.</li> </ul>                                                                                                                                                                                                                                        |
| Jaworek et al. (2021)                    | Meta analysis          | 59 | Analysis of GWAS study data from various studies across North America, Europe and Asia looking at early onset ischemic stroke patients (16 927) versus controls (576 353). | <ul style="list-style-type: none"> <li>A relationship between genetic variants at the known stroke locus <i>ABO</i> and venous thrombosis were identified, pointing to a role of prothrombotic factors in early onset stroke compared to later onset stroke.</li> </ul>                                                                                                                                              |

Table S8. Model AUROC and Accuracy for all the models.

| CRITERIA | MODEL | FEMALE      |             | MALE        |             |
|----------|-------|-------------|-------------|-------------|-------------|
|          |       | AUROC       | ACCURACY    | AUROC       | ACCURACY    |
| ≤ 40     | GLM   | 0.803461753 | 0.96875     | 0.828431373 | 0.979452055 |
| ≤ 40     | RF    | 0.829006142 | 0.961538462 | 0.896095938 | 0.980821918 |
| ≤ 40     | SVM   | 0.841359576 | 0.956730769 | 0.864058123 | 0.976712329 |
| ≤ 40     | XGB   | 0.831728085 | 0.961538462 | 0.923231793 | 0.978082192 |
| ≤ 45     | GLM   | 0.872972127 | 0.956043956 | 0.927642353 | 0.968409586 |
| ≤ 45     | RF    | 0.873222675 | 0.954212454 | 0.898163895 | 0.968409586 |
| ≤ 45     | SVM   | 0.82793611  | 0.952380952 | 0.861126858 | 0.953159041 |
| ≤ 45     | XGB   | 0.886783589 | 0.956043956 | 0.920808138 | 0.965141612 |
| ≤ 46     | GLM   | 0.834217437 | 0.949913644 | 0.938984624 | 0.970863684 |
| ≤ 46     | RF    | 0.954516807 | 0.960276339 | 0.969101273 | 0.97710718  |
| ≤ 46     | SVM   | 0.853019958 | 0.93955095  | 0.906906151 | 0.975026015 |
| ≤ 46     | XGB   | 0.778098739 | 0.949913644 | 0.96181071  | 0.976066597 |
| ≤ 47     | GLM   | 0.78535692  | 0.946166395 | 0.909286348 | 0.9632572   |
| ≤ 47     | RF    | 0.923032252 | 0.95269168  | 0.95610594  | 0.974180735 |
| ≤ 47     | SVM   | 0.883945323 | 0.967373573 | 0.893284574 | 0.973187686 |
| ≤ 47     | XGB   | 0.828977933 | 0.946166395 | 0.878025266 | 0.953326713 |
| ≤ 48     | GLM   | 0.878537026 | 0.956790123 | 0.893962076 | 0.957386364 |
| ≤ 48     | RF    | 0.923765804 | 0.962962963 | 0.95413802  | 0.96969697  |
| ≤ 48     | SVM   | 0.892910897 | 0.962962963 | 0.921000591 | 0.96969697  |
| ≤ 48     | XGB   | 0.871086695 | 0.949074074 | 0.888842685 | 0.961174242 |
| ≤ 49     | GLM   | 0.842827004 | 0.944117647 | 0.884869432 | 0.956834532 |
| ≤ 49     | RF    | 0.932934467 | 0.952941176 | 0.930675883 | 0.981115108 |
| ≤ 49     | SVM   | 0.882087289 | 0.966176471 | 0.925345622 | 0.966726619 |
| ≤ 49     | XGB   | 0.852304193 | 0.944117647 | 0.89984639  | 0.958633094 |
| ≤ 50     | GLM   | 0.837510443 | 0.947148818 | 0.896639419 | 0.949615713 |
| ≤ 50     | RF    | 0.797493734 | 0.940194715 | 0.88969119  | 0.951323655 |
| ≤ 50     | SVM   | 0.735254804 | 0.924895688 | 0.68564941  | 0.954739539 |
| ≤ 50     | XGB   | 0.82428293  | 0.936022253 | 0.890735695 | 0.947907771 |
| ≤ 51     | GLM   | 0.872569444 | 0.92989418  | 0.892112611 | 0.944535073 |
| ≤ 51     | RF    | 0.833752395 | 0.92989418  | 0.876204297 | 0.946982055 |
| ≤ 51     | SVM   | 0.79194205  | 0.933862434 | 0.817498593 | 0.933931485 |
| ≤ 51     | XGB   | 0.846791188 | 0.92989418  | 0.880028252 | 0.947797716 |
| ≤ 52     | GLM   | 0.825573777 | 0.93718593  | 0.863145167 | 0.93725794  |
| ≤ 52     | RF    | 0.82316811  | 0.929648241 | 0.850685786 | 0.938032533 |
| ≤ 52     | SVM   | 0.75692525  | 0.922110553 | 0.788601413 | 0.934159566 |
| ≤ 52     | XGB   | 0.831541879 | 0.927135678 | 0.846869569 | 0.938032533 |
| ≤ 53     | GLM   | 0.827361447 | 0.935560859 | 0.853823701 | 0.938970588 |
| ≤ 53     | RF    | 0.853979765 | 0.928400955 | 0.845689544 | 0.938970588 |
| ≤ 53     | SVM   | 0.805192945 | 0.910501193 | 0.750173841 | 0.938235294 |
| ≤ 53     | XGB   | 0.83196347  | 0.935560859 | 0.856815389 | 0.943382353 |
| ≤ 54     | GLM   | 0.843442031 | 0.928733032 | 0.882503113 | 0.938904494 |
| ≤ 54     | RF    | 0.831104039 | 0.926470588 | 0.853013007 | 0.931882022 |

|      |     |             |             |             |             |
|------|-----|-------------|-------------|-------------|-------------|
| ≤ 54 | SVM | 0.790815307 | 0.932126697 | 0.80959596  | 0.9375      |
| ≤ 54 | XGB | 0.833440954 | 0.926470588 | 0.891331119 | 0.933988764 |
| ≤ 55 | GLM | 0.816898328 | 0.925646552 | 0.851307741 | 0.928475936 |
| ≤ 55 | RF  | 0.806476964 | 0.920258621 | 0.83166942  | 0.928475936 |
| ≤ 55 | SVM | 0.756235735 | 0.90625     | 0.731061885 | 0.922459893 |
| ≤ 55 | XGB | 0.78267525  | 0.920258621 | 0.866143807 | 0.928475936 |
| ≤ 60 | GLM | 0.809771296 | 0.894425676 | 0.873043704 | 0.907725322 |
| ≤ 60 | RF  | 0.784613149 | 0.896114865 | 0.858648586 | 0.91416309  |
| ≤ 60 | SVM | 0.658112784 | 0.897804054 | 0.77747596  | 0.887339056 |
| ≤ 60 | XGB | 0.791702711 | 0.893581081 | 0.87054903  | 0.906652361 |
| ≤ 65 | GLM | 0.813875668 | 0.886426593 | 0.855487803 | 0.883355765 |
| ≤ 65 | RF  | 0.798825435 | 0.894736842 | 0.816722707 | 0.871691341 |
| ≤ 65 | SVM | 0.720966327 | 0.861495845 | 0.755686768 | 0.86855092  |
| ≤ 65 | XGB | 0.811077194 | 0.885041551 | 0.856267392 | 0.885150292 |
| ≤ 70 | GLM | 0.797022895 | 0.865065752 | 0.842223092 | 0.863844394 |
| ≤ 70 | RF  | 0.793662985 | 0.866209262 | 0.824030843 | 0.856216629 |
| ≤ 70 | SVM | 0.709253164 | 0.86049171  | 0.75825163  | 0.845156369 |
| ≤ 70 | XGB | 0.807561017 | 0.865637507 | 0.847189459 | 0.8668955   |
| ≤ 75 | GLM | 0.793988392 | 0.844285714 | 0.829473082 | 0.853118712 |
| ≤ 75 | RF  | 0.786573265 | 0.847619048 | 0.811194257 | 0.845405768 |
| ≤ 75 | SVM | 0.653210883 | 0.853333333 | 0.701599898 | 0.850771294 |
| ≤ 75 | XGB | 0.813231243 | 0.851904762 | 0.837537408 | 0.851441985 |
| ALL  | GLM | 0.74815658  | 0.825197709 | 0.803035755 | 0.836578753 |
| ALL  | RF  | 0.742352445 | 0.819198255 | 0.786627295 | 0.839783091 |
| ALL  | SVM | 0.669266845 | 0.827379329 | 0.722417958 | 0.83386739  |
| ALL  | XGB | 0.771037867 | 0.830379056 | 0.813710721 | 0.836085778 |
| ≤ 80 | GLM | 0.768905097 | 0.831844029 | 0.818175239 | 0.848903575 |
| ≤ 80 | RF  | 0.747318829 | 0.828594639 | 0.802342232 | 0.835386002 |
| ≤ 80 | SVM | 0.724993951 | 0.829406986 | 0.765827601 | 0.842895764 |
| ≤ 80 | XGB | 0.774253114 | 0.834687246 | 0.832648711 | 0.847702013 |

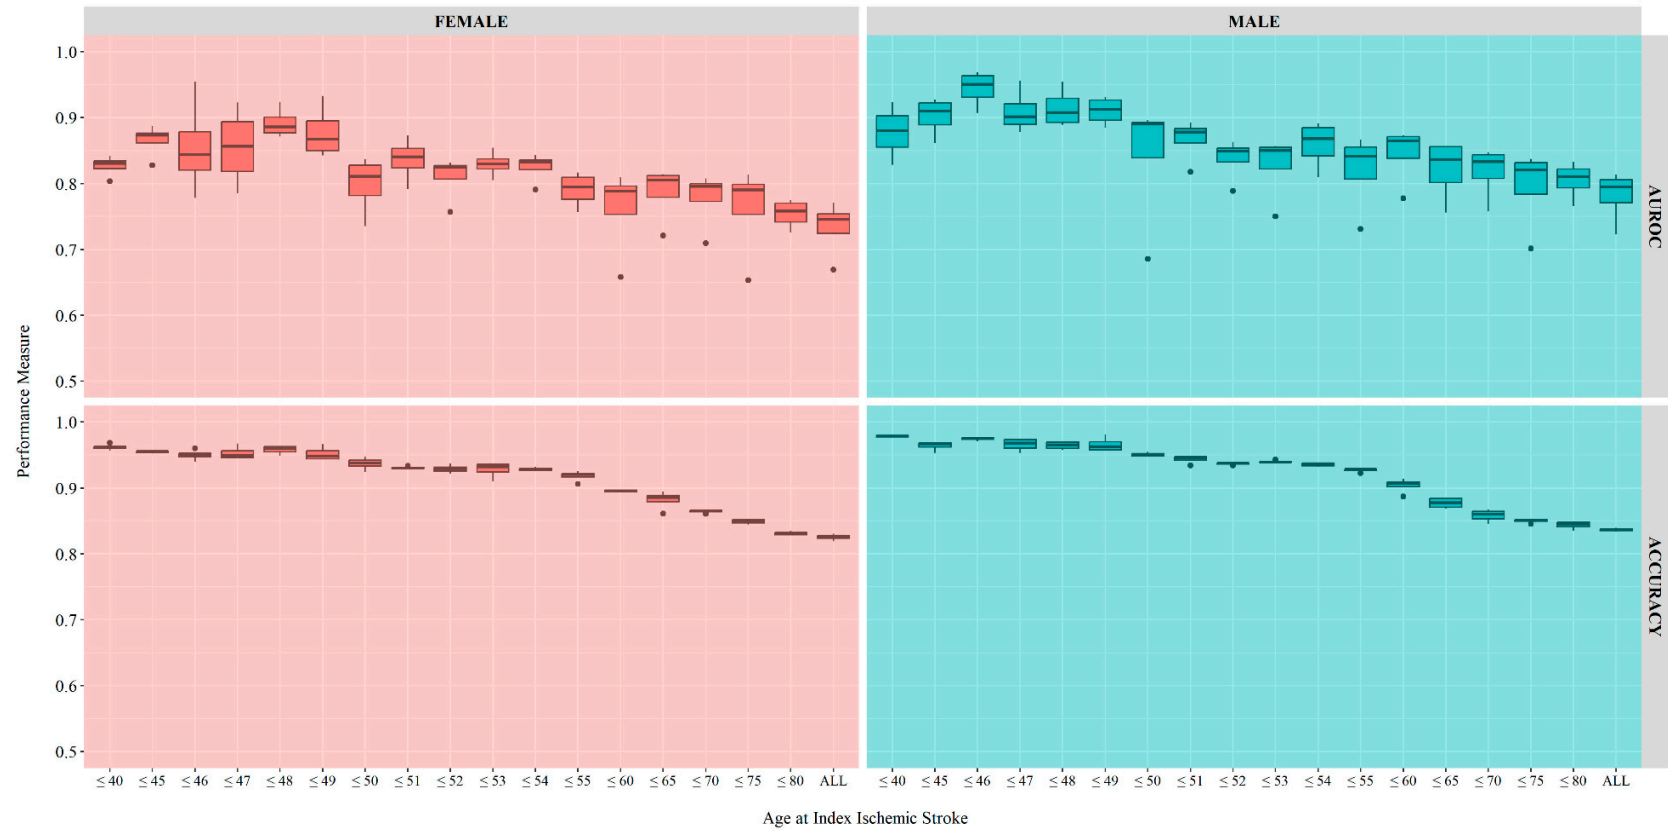

**Figure S1.** Model performance (AUROC and Accuracy) for different models. Performance measures for all the models are listed in Table S8.
